# Supplementary material for: Facilitative lysosomal transport of bile acids alleviates ER stress in mouse hematopoietic precursors
Source: PubMed Central journal article supplement (PMC7902824; doi:10.1038/s41467-021-21451-6), 2021-02-23
Supplement: 41467_2021_21451_MOESM1_ESM.pdf [file 41467_2021_21451_MOESM1_ESM.pdf]

1  
2  
3  
4  
5  
6  
7  
8  
9  
10  
11  
12  
13  
14  
15  
16  
17  
18  
19  
20  
21  
22  
23  
24  
25  
26  
27  
28  
29

**Supplemental Information**

**Facilitative lysosomal transport of bile acids alleviates ER stress in mouse hematopoietic precursors**

**Persaud et al.**

## 30 **Supplemental Materials and Methods**

31

### 32 **Gene expression analysis**

33

34 Total RNA was extracted from cells using the RNeasy Mini Kit (Qiagen, Valencia, CA)  
35 following the manufacturer's protocol, and the RNA quality and quantity were measured using  
36 the NanoDrop™ 2000 Spectrophotometer (ThermoFisher Scientific, Waltham, MA).

37 Quantitative PCR detection of genes was reported after reverse transcription of 1 µg of total RNA  
38 using the High Capacity cDNA Reverse Transcription Kit (ThermoFisher Scientific, Waltham,  
39 MA). qPCR was performed using the PowerUP SYBR Green Master Mix (ThermoFisher  
40 Scientific, Waltham, MA) with sequence-specific primers (Sigma).  $\Delta\Delta\text{CT}$  method (1) was used  
41 to determine the expression levels of genes under investigation by normalizing the Ct values to  
42 *GAPDH*. Each gene was amplified independently, and all experiments were performed in  
43 triplicate. Exon-spanning primers were designed using the primer bank web application and are  
44 described in Table S3.

45

### 46 **Lysosome Isolation and Enrichment**

47

48 Enriched lysosomes from mouse bone marrow cells were obtained using a lysosome  
49 isolation kit (LYSISO1, Sigma-Aldrich, St. Louis, MO) with differential centrifugation, followed  
50 by a density gradient centrifugation and calcium precipitation, as mentioned in the  
51 manufacturer's protocol. In brief, bone marrow cell homogenates (H) were first prepared in 1x  
52 extraction buffer using a glass Dounce homogenizer and were subjected to centrifugation for 10  
53 min at 1,000 xg at 4°C to remove the nuclear pellet (NP). The post-nuclear supernatant (PNS)  
54 obtained from the earlier step was further centrifuged at 20,000 xg at 4°C to obtain the crude

55 lysosomal fraction (CLF) containing a mixture of lysosomes and other cell organelles, while the  
56 resulting supernatant fraction was collected as the cytosolic fraction (CF). The CLF was re-  
57 suspended in a minimal volume of 1x extraction buffer (0.8mL per gram mice tissue) and  
58 purified via density gradient centrifugation at 150,000 xg for 4 h on a multistep OptiPrep  
59 gradient (8-27%), according to the manufacturer's details. Altogether, 10 fractions of 500  $\mu$ L  
60 each were collected, starting from the top of the gradient, and labeled as ELF 1-10 fractions  
61 (Enriched Lysosomal Fraction). Further purification of the ELF fractions was carried out using  
62 calcium chloride solution (250 mM), which precipitated the rough endoplasmic reticulum and  
63 mitochondria followed by its subsequent centrifugation at 5,000 xg at 4°C to obtain the PLF 1-10  
64 fractions (Purified Lysosomal Fraction). In order to determine the enrichment as well as recovery  
65 of lysosomes, the homogenates as well as the different lysosomal fractions were assayed for  
66 protein concentration (using BCA protein assay) and acid phosphatase activity, a lysosomal  
67 marker enzyme (CS0740, Sigma-Aldrich, St. Louis, MO); while intactness of the lysosomes was  
68 assessed, using neutral red dye assay provided with the LYSIS01 kit. Enriched lysosomes from  
69 mouse HSCs were obtained using the Minute<sup>TM</sup> Lysosome Isolation Kit (Invent Biotechnologies,  
70 INC., Plymouth, MN) following the manufactures protocol. Then, the expression of different  
71 subcellular marker proteins in the lysosomal fractions were evaluated using Western blotting  
72 analysis by probing with specific antibodies against each marker protein like LAMP1.

73

#### 74 **ER Isolation and Enrichment**

75

76 Enriched ER from mouse bone marrow cells were obtained using the ER isolation kit  
77 (ER0100) from Sigma-Aldrich (St. Louis, MO) with differential centrifugation and calcium  
78 precipitation, as mentioned in the manufacturer's protocol. In brief, bone marrow cell

79 homogenates (H) were first prepared in isotonic extraction buffer using a glass Dounce  
80 homogenizer and were subjected to centrifugation for 10 min at 1,000 xg at 4°C to remove the  
81 nuclear pellet (NP). The post-nuclear supernatant (PNS) obtained from the earlier step was  
82 further centrifuged at 12,000 xg at 4°C for 15min to obtain the post mitochondrial fraction (PMF)  
83 containing a mixture of ER and other cell organelles. Enriched RER was prepared by calcium  
84 chloride (8mM) precipitation of PMF followed by centrifugation for 10 min at 8,000 xg at 4°C.  
85 In order to determine the enrichment as well as recovery of ER, the homogenates as well as the  
86 ER fraction were assayed for protein concentration (using BCA protein assay) and NADPH  
87 cytochrome c reductase activity, an ER marker enzyme (CY0100, Sigma-Aldrich, St. Louis,  
88 MO). Also, the expression of different subcellular marker proteins in the ER fractions were  
89 evaluated using Western blotting analysis by probing with specific antibodies against each  
90 marker protein.

91

## 92 **Immunoblots**

93

94 Whole cell lysates from blood cells were made in TNE buffer supplemented with  
95 protease and phosphatase inhibitors. Total cell lysate containing 20 µg of protein were separated  
96 by SDS-PAGE on an 8% or 12% polyacrylamide gel using the Bio-Rad gel electrophoresis  
97 system following the manufacturer's protocol. Separated proteins were transferred onto PVDF  
98 membranes using the Bio-Rad Trans-Blot Turbo Transfer System. Western blot analysis was  
99 performed using GRP78 (Abcam 108615, 1:1000), GRP94 (Abcam 230842, 1:1000), p-PERK  
100 (CST 3192, 1:1000), eIF2α (CST 9722, 1:1000), p-eIF2α (CST 9721, 1:1000), IRE1 (Abcam  
101 37073, 1:1000), p-IRE1 (Abcam 48187, 1:1000), ATF6 (Novus Biologicals 40256, 1:1000),  
102 ENT3 (ThermoFisher Scientific PA5-38039, 1:1000), and LAMP1 (CST 3243S, 1:1000) primary

103 antibodies, with GAPDH (CST 97166, 1:5000) as a loading control. Rabbit (Bethyl A120-201P,  
104 1:5000) and mouse (Bethyl A90-116P, 1:5000) secondary antibodies were used, and proteins  
105 were visualized using the SuperSignal™ West Pico PLUS Chemiluminescent Substrate  
106 (ThermoFisher Scientific, Waltham, MA) on the ChemiDoc MP Imaging System from Bio-Rad.  
107 The Image Lab 5.2.1 software (Bio-Rad Laboratories, Hercules, CA) was used for immunoblot  
108 analysis. Raw blots are provided in the Data Source file.

109  
110 **XPB1 splicing assay**

111  
112 Total RNA was extracted from ST-HSCs using the RNeasy Mini Kit (Qiagen, Valencia,  
113 CA) and reverse transcribed to cDNA using the SuperScript™ IV First-Strand cDNA Synthesis  
114 System (ThermoFisher Scientific, Waltham, MA) with random hexamers and RNase inhibitor  
115 added. The spliced (228bp) and unspliced (254bp) XPB1 cDNA segments were amplified by  
116 PCR using the Phusion Flash High Fidelity polymerase (ThermoFisher Scientific, Waltham,  
117 MA) and primers described in Table S3. Amplified PCR products were run on a 2% agarose gel  
118 stained with ethidium bromide in 1X UltraPure TBE buffer (ThermoFisher Scientific, Waltham,  
119 MA), and imaged on ChemiDoc MP Imager (Bio-Rad, Hercules, CA). All samples were assayed  
120 in duplicate with GAPDH as a loading control and subjected to densitometry measurements by  
121 AlphaView Software 3.3 (Protein Simple, Santa Clara, CA).

122  
123 **Metabolomic analysis-Instrumentation**

124  
125 Untargeted metabolomics analysis was performed on a Thermo Fisher Scientific LTQ  
126 Orbitrap XL™ Hybrid Ion Trap-Orbitrap hybrid mass spectrometer and a Waters 2795 HPLC  
127 separation module interfaced by electrospray ionization (ESI) source. For targeted metabolomics  
128 analysis, a Thermo Fisher Scientific Vanquish™ UHPLC system connected to TSQ Quantiva™  
129 Triple Quadrupole Mass Spectrometer and interfaced with a heated electrospray ionization

130 (HESI-II) source. On both the instruments, data acquisition and analysis was conducted using  
131 Thermo Xcalibur™ software.

132 Solid phase extraction (SPE) was carried out using Visiprep™ SPE Vacuum Manifold  
133 (Sigma-Aldrich, St. Louis, MO). Mettler AE163 analytical balance was used for weighing  
134 standards and buffers. An ultra-low upright temperature freezer from New Brunswick  
135 (Eppendorf) maintained at  $-70 \pm 10^{\circ}\text{C}$  was used to store the plasma, urine and tissue samples. In  
136 addition, a branson 2800 ultrasonicator, Savant™ SPD121P SpeedVac and Eppendorf™ 5424R  
137 Microcentrifuge were used for study sample preparation.

138

### 139 **Metabolomic analysis-Sample Preparation and Extraction**

140

141 Initially, all the samples i.e. plasma, urine, liver and bone marrow cell samples were  
142 thawed on ice to avoid metabolite degradation. The plasma and the urine samples were vortexed  
143 and centrifuged at 21,000  $xg$  prior to sample preparation. Since LT-HSC levels are low in mice,  
144 we pooled LT-HSCs from multiple mice (10-12 mice/group) within each group to obtain  
145 sufficient cells for our analysis. Quality control samples were prepared by creating a pooled  
146 sample for each matrix.

147 For reversed phase (RP) mode analysis, plasma and urine samples were extracted with  
148 200  $\mu\text{L}$  of cold acetonitrile: methanol (3:1,  $v/v$ ); while 200  $\mu\text{L}$  of cold methanol: water (1:1,  $v/v$ )  
149 was used in case of hydrophilic interaction liquid chromatography (HILIC) mode analysis. After  
150 vortex-mixing, the samples were centrifuged at 21,000  $xg$  at  $4^{\circ}\text{C}$  for 10 min and 10  $\mu\text{L}$  of the  
151 supernatant was injected into the LC-FTMS system.

152 For subcellular analysis, samples corresponding to 100 µg of lysosomal or ER protein  
153 (determined using protein concentration by BCA assay) were extracted with 100 µL of cold  
154 acetonitrile: methanol (3:1, v/v). The samples were vortex-mixed and then, centrifuged at 21,000  
155 xg at 4°C for 10 min. The supernatant was filled in autosampler vials and volumes of 10 µL  
156 injected into the LC-FTMS system.

157

### 158 **LC-FTMS Data Analysis**

159

160 Untargeted metabolomics data processing was performed using the open source software  
161 package MZmine v.2.21 (<http://mzmine.sourceforge.net/>). Briefly, peak detection was performed  
162 using the following filter conditions: chromatography peak intensity signal/noise > 25, retention  
163 time tolerance: ± 0.25 min, and m/z tolerance: ± 0.04, followed by normalization using reserpine  
164 and 4-nitrophenol as internal standards for positive and negative mode respectively. Then, a  
165 chromatogram for each mass was constructed, which was deconvoluted into individual peaks  
166 using the local minimum search algorithm. To remove isotopic peaks from the peak list, the  
167 deconvoluted data were processed using the isotopic peak grouper algorithm. RANSAC  
168 algorithm was applied to align detected peaks in the different samples, generating an aligned  
169 peak list for *Slc29a3*<sup>+/+</sup> and *Slc29a3*<sup>-/-</sup> samples. The aligned peak lists containing m/z, retention  
170 time and peak area were exported to Microsoft<sup>®</sup> Excel and filtered based on coefficient of  
171 variation (CV) for the QC samples (< 20%) and normalized p-values for the *Slc29a3*<sup>-/-</sup> samples  
172 (< 0.05). Database search using HMDB, KEGG & LipidMaps was performed to establish peak  
173 identities for each of the m/z in this filtered aligned list with a mass tolerance set to ±10 ppm.  
174 Peak identification was based on both accurate mass and calculated formula matching. In

175 addition, tandem mass spectra of pure standards confirmed the identity of the metabolites  
176 examined in the transport assay.

177         The identified peak lists containing peak identities, sample identities and their normalized  
178 peak area intensities were imported separately into MetaboAnalyst<sup>®</sup> 3.0 for multivariate data  
179 analysis. Briefly, data normalization of each dataset was initially performed using log  
180 transformation and pareto-scaling with the missing values (if any) being replaced by a small  
181 default value. Principal component analysis (PCA), partial least squares discriminant analysis  
182 (PLS-DA) as well as orthogonal projection to latent structures discriminant analysis (OPLS-DA)  
183 was used to visualize clustering of the *Slc29a3*<sup>+/+</sup> and *Slc29a3*<sup>-/-</sup> samples along with the QCs.  
184 Unsupervised hierarchical clustering for data overview of each of the datasets was accomplished  
185 with help of a heatmap generated using t-test, Euclidean distance measure and Ward clustering  
186 algorithm. Cross-validated PLS-DA was used to obtain a list of discriminating metabolites from  
187 each dataset, ranked according to their Variable Importance in Projection (VIP) scores, with VIP  
188 >1.0 being considered relevant for group discrimination.

189

### 190 ***Xenopus* Oocyte Transport Assay**

191

192         The construction of pOX-Δ36hENT3 *Xenopus* expression vector and *in vitro*  
193 transcription and expression of Δ36hENT3 in *Xenopus* oocytes were described earlier (2, 3).  
194 Transport of radiolabeled substrates was conducted as described before (4). Briefly, 50 nanoliters  
195 (400–800 ng/μl) of Δ36hENT3 mRNA were injected into defolliculated oocytes. The injected  
196 oocytes were incubated at 15 °C for 24 h before performing transport assays. Uptake of  
197 radiolabeled substrates (<sup>3</sup>H-adenosine or <sup>3</sup>H-BAs; 0.02 μM) supplemented in combination with  
198 unlabeled substrates (to a final concentration of 100 μM; for estimation of kinetic parameters)



199 was measured after 30 min of incubation in transport buffer (100 mM NaCl, 2 mM KCl, 1 mM  
200 CaCl<sub>2</sub>, 1 mM MgCl<sub>2</sub>, and 10 mM HEPES, pH 5.5) at room temperature. Uptake was terminated  
201 by washing oocytes 3 times with arrest buffer (20 mM Tris-HCl, 3 mM K<sub>2</sub>HPO<sub>4</sub>, 1 mM  
202 MgCl<sub>2</sub>·6H<sub>2</sub>O, 2 mM CaCl<sub>2</sub>, 5 mM glucose, 130 mM N-methyl-D-glucamine) containing 20 mM  
203 uridine. Individual oocytes were shaken overnight in 10% SDS for complete dissolution, and  
204 then the radioactivity was quantified by Beckman liquid scintillation counter. Data represent the  
205 average ± S.E. (n = 5–10 oocytes). The results were normalized for experimental variations and  
206 analyzed using Graphpad prism software. The kinetic parameters, K<sub>m</sub> and V<sub>max</sub> were calculated  
207 by fitting the data of uptake rate of identified metabolites to the Michaelis-Menten equation. A  
208 representative experiment from 3–5 independent experiments is presented.

209         The mass spectrometric validation of the transport of all unlabeled metabolites was  
210 performed with oocytes according to the method reported earlier. Briefly, the oocytes obtained  
211 after treatment with wash buffer was homogenized with 200 μL of extraction buffer (50%  
212 methanol containing 0.1% acetic acid) and spiked with cholic acid-d<sub>4</sub> (1 μg/mL) and glycocholic  
213 acid-d<sub>4</sub> (1 μg/mL) as internal standards. After incubation at 4 °C for 24 h, samples were  
214 centrifuged at 20,000g for 10 min and supernatants collected. Samples (10 μL) were injected into  
215 the Thermo Scientific Vanquish UPLC system (Waltham, MA) interfaced with Thermo  
216 Scientific TSQ Quantiva triple-stage quadrupole mass spectrometer (Waltham, MA) equipped  
217 with H-ESI ion source. MS detection was carried out in positive and negative ionization modes  
218 and the transition monitored for each metabolite were reported in table (Table S2 and S3). The  
219 operational mass spectrometric parameters included capillary voltage: 4.5 kV; sheath gas: 35  
220 arbitrary units; auxiliary gas: 10 arbitrary units; sweep gas: 2 arbitrary units; ion transfer tube  
221 temperature: 350°C; vaporizer temperature: 450°C; Dwell time: 50 ms per transition; Collision

222 Energy (CE): 5 V and collision induced dissociation (CID) gas: 1.5 mtorr. Chromatographic  
223 separation was carried out on a Kinetex C<sub>18</sub> (100 X 2.1mm; 1.7 μm particle size) from  
224 Phenomenex (Torrance, CA). The mobile phase consisted of solvent A: Water (0.1 % formic  
225 acid) and Solvent B: Acetonitrile (0.1 % formic acid). The flow rate was set at 0.5 mL/min and  
226 the gradient program used was 0 min: 10% B; 2 min: 10% B; 5 min: 22% B; 20 min: 95% B; 24  
227 min 95%B; 25 min: 10% B; 30 min: 10% B. The total run time was 30 min per sample and the  
228 auto-sampler was maintained at 4°C throughout the analysis.

229

### 230 **ENT3 Overexpression in HEK293 cells and HEK293 Transport Assay**

231

232 HEK293 cells were seeded at a density of  $1.0 \times 10^5$  cells/well in 24-well plates. After 24  
233 hours, cells were transfected with a plasmid encoding ENT3 (pEYFP-ENT3) described  
234 previously (2,3) using Lipofectamine 3000 following the manufacture's protocol. The culture  
235 media was removed 24 hours post-transfection, and transport buffer (20 mM Tris-HCl, 3 mM  
236 dipotassium phosphate, 1 mM magnesium, 2 mM calcium chloride, and 5 mM glucose)  
237 containing 1 μM cholic acid (CA; including 0.02 μM <sup>3</sup>H-cholic acid) was added to each cell type  
238 for 0.5, 3, 12 or 24 hours. Uptake was terminated by washing the cells with arrest buffer as  
239 previously described (3), and radioactivity was quantified using the Beckman liquid scintillation  
240 counter after cell lyses with 10% SDS. Protein was quantified using the Pierce™ BCA Protein  
241 Assay Kit (23225), and DPM values were normalized to protein content and presented as  
242 pmol/mg of protein.

243

### 244 **3D QSAR Analysis**

245

246 3D QSAR models were built through the 3D-QSAR online server ([http://www.3d-](http://www.3d-qsar.com/)  
247 [qsar.com/](http://www.3d-qsar.com/)). The transport data relative to adenosine of 21 BA compounds was employed as the  
248 training dataset to build 3D QSAR models. 2D chemical structures of BAs were converted to 3D  
249 structures and subsequently minimized using Chem3D 16.0 (PerkinElmer/CambridgeSoft, UK).  
250 30 conformations for each BA molecule were generated using Py-ConfSearch, and all  
251 conformations were aligned to a cholic acid conformation with the RDKit method. After the  
252 alignment, molecular interaction field (MIF) point based descriptors were used for building 3D-  
253 QSAR models with known BA transport values with Py-CoMFA. The MIFs were generated  
254 using C.3, C.cat, N.3, O.3, H, and C.2 as atom probes. Both electrostatic and steric interaction  
255 fields were used. The sample point maximum distance was set to 1.0 Å. The experimental  
256 transport coefficients relative to adenosine ( $TC_{ade}$ ) were converted to their positive-logarithmic  
257 scale by using the formula:  $pTC_{ade} = -\log(TC_{ade})$  and defined as the dependent variable. The  
258 partial least square (PLS) regression method was used through the 3D-QSAR Py-CoMFA  
259 module. The maximum number of components was set to 8, and Y scrambles were set to 10. The  
260 derived QSAR models were assessed by regression coefficient ( $r^2$ ) and validated by leave-one-  
261 out (LOO) cross-regression coefficient ( $q^2$ ). The robustness of the derived 3D-QSAR models  
262 were validated by the leave-one-out (LOO) technique.

263

### 264 **Lentiviral gene transfer in mouse LSKs and HSCs**

265

266 Lentiviruses harboring ENT3 or RFP were generated in HEK293T (packaging) cells by  
267 transfecting the target plasmids (Applied Biological Materials Inc., BC, Canada) and packaging  
268 plasmids (Trans-Lentiviral ORF Packaging Kit, Dharmacon, IL, USA), using the calcium  
269 phosphate transfection method as per the manufacturer's instructions. For viral transduction,

270 HSPCs were transduced with lentivirus ( $10^8$  transduction units) in the presence of 8  $\mu\text{g}/\text{ml}$   
271 polybrene in HSC medium on polypropylene tubes pre-coated with 1% bovine serum albumin  
272 (BSA), centrifuged at 1500  $\times g$  for 3 h at 32°C and incubated for 24 h without centrifugation.

273  
274 **Colony-forming cell (CFC) assay**

275  
276 HSCs were plated at a concentration of  $3.0 \times 10^5$  in semisolid MethoCult media  
277 containing a cocktail of cytokines designed for burst-forming unit-erythroid (STEMCELL  
278 Technologies, SF M3436) and colony-forming unit-erythroid (STEMCELL Technologies,  
279 M3334) enumeration following the manufacture's protocol. Burst-forming unit-erythroid (BFU-  
280 E) and colony-forming unit-erythroid (CFU-E) were quantified after 14 days with and without  
281 salubrinal treatment (10 mM) using a Bright-field microscope.

282  
283 **References**

- 284 1. Schmittgen, T. & Livak, K. Analyzing real-time PCR data by the comparative CT method.  
285 *Nature Protocols* 3, 1101-1108 (2008).
- 286 2. Govindarajan, R., Leung, G.P.H., Zhou, M., Tse, C., Wang, J., and Unadkat, J.D. Facilitated  
287 mitochondrial import of antiviral and anticancer nucleoside drugs by human equilibrative  
288 nucleoside transporter-3. *American Journal of Physiology-Gastrointestinal and Liver*  
289 *Physiology* 296, G910-G922(2009).
- 290 3. Kang, N., Jun, A. H., Bhutia, Y. D., Kannan, N., Unadkat, J. D., and Govindarajan, R.  
291 Human equilibrative nucleoside transporter-3 (hENT3) spectrum disorder mutations impair  
292 nucleoside transport, protein localization, and stability. *J. Biol. Chem.* 285, 28343–28352  
293 (2010).
- 294 4. Rahman, M., Askwith, C. & Govindarajan, R. Molecular determinants of acidic pH-  
295 dependent transport of human equilibrative nucleoside transporter 3. *Journal of Biological*  
296 *Chemistry* 292, 14775-14785 (2017).

Supplemental Figures

Supplemental Figure 1

Spleen (cCasp3)

**a**

*Slc29a3*<sup>+/+</sup>

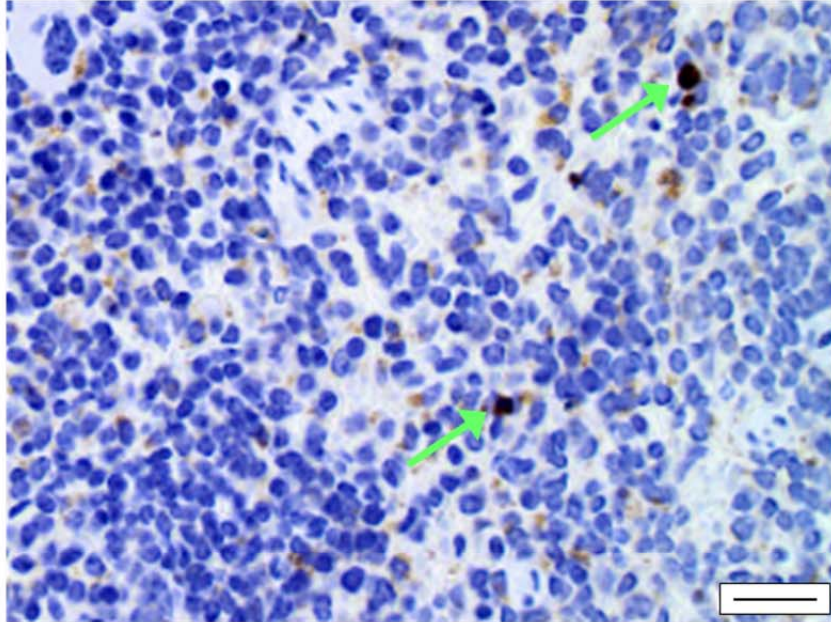

**b**

*Slc29a3*<sup>-/-</sup>

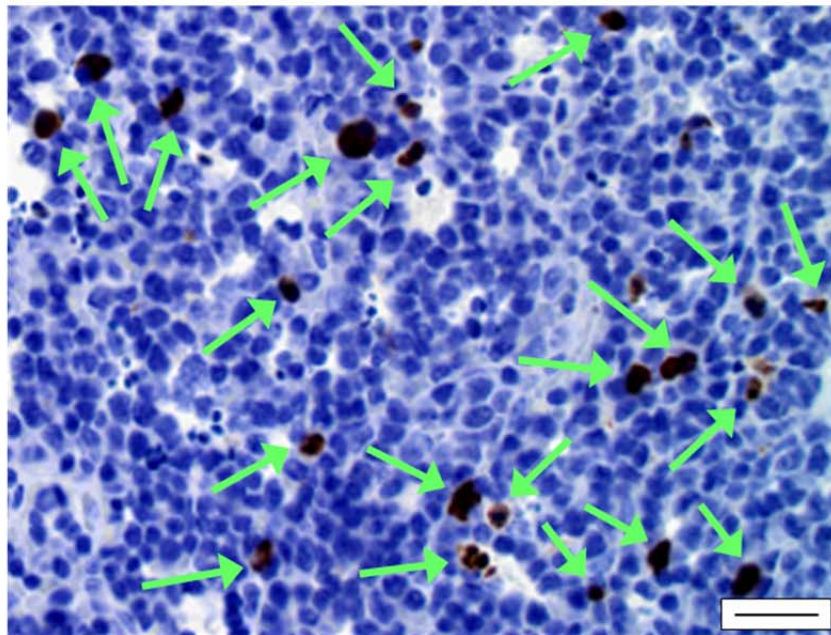

297  
298  
299  
300  
301  
302  
303  
304  
305  
306  
307  
308  
309  
310  
311  
312  
313  
314  
315  
316  
317  
318  
319  
320  
321  
322  
323  
324  
325  
326  
327  
328  
329  
330  
331  
332  
333  
334  
335  
336  
337  
338  
339  
340  
341  
342  
343  
344  
345  
346  
347  
348  
349

350 **Supplemental Fig 1.** *Slc29a3*<sup>-/-</sup> mice have increased splenic apoptosis. (a) Representative  
351 histological image of *Slc29a3*<sup>+/+</sup> spleen at 16 weeks immunostained for cleaved caspase 3  
352 (cCasp3; *brown*) showing few hematopoietic cells undergoing apoptosis as indicated by green  
353 arrows. (40x; Scale bar = 20 mm). One representative image from three independent experiments  
354 is shown. (b) Representative histological image of *Slc29a3*<sup>-/-</sup> spleen at 16 weeks immunostained  
355 for cleaved caspase 3 (cCasp3; *brown*) showing numerous hematopoietic cells undergoing  
356 apoptosis as indicated by green arrows. (40x; Scale bar = 20 mm). One representative image  
357 from three independent experiments is shown. Bone marrow sections were not amenable for  
358 immunostaining due to the decalcification process.

359

360

361

362

363

364

365

366

367

368

369

370

371

372

373

374

375

376

377

Supplemental Figure 2

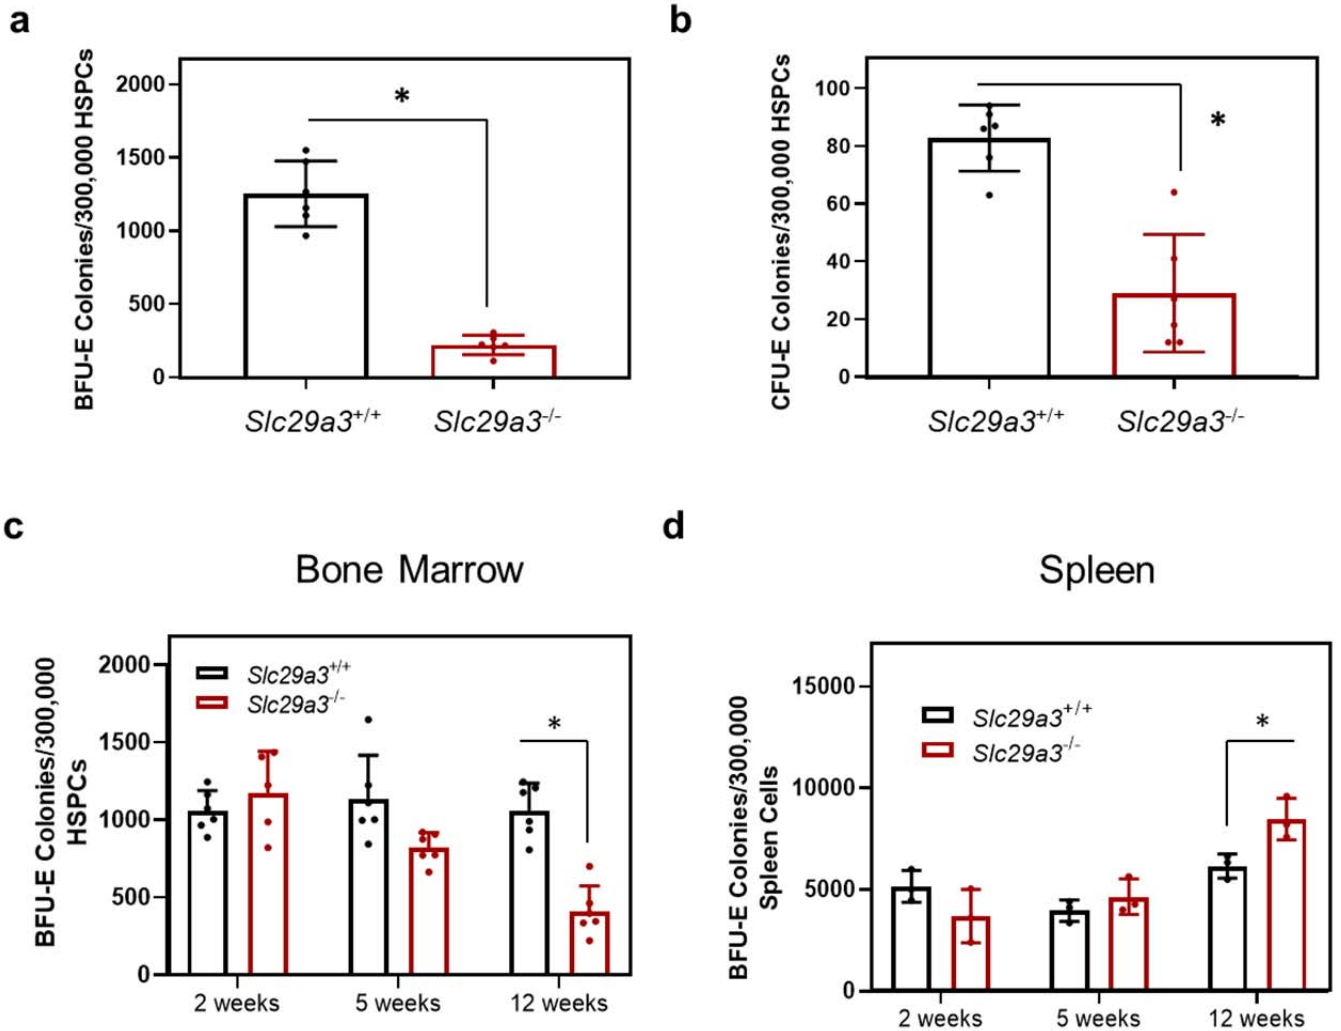

378  
379  
380  
381  
382  
383  
384  
385  
386  
387  
388  
389  
390  
391  
392  
393  
394  
395  
396  
397  
398  
399  
400  
401  
402  
403  
404  
405  
406  
407  
408  
409  
410  
411

412 **Supplemental Fig. 2.** The loss of ENT3 decreases *Slc29a3*<sup>-/-</sup> mouse HSPC differentiation into  
413 erythroid precursors. **(a)** Colony enumeration of burst forming unit-erythrocytes (BFU-E)  
414 produced from *Slc29a3*<sup>+/+</sup> (*black*) and *Slc29a3*<sup>-/-</sup> (*red*) HSPCs from 12-weeks-old mice (*n* = 6  
415 mice/group , mean ± SEM, \**p* < 0.05 by two-tailed t-test). **(b)** Colony enumeration of colony  
416 forming unit-erythrocytes (CFU-E) produced from *Slc29a3*<sup>+/+</sup> (*black*) and *Slc29a3*<sup>-/-</sup> (*red*) HSPCs  
417 from 12-week-old mice (*n* = 6 mice/group, mean ± SEM, \**p* < 0.05 by two-tailed t-test). **(c)**  
418 Colony enumeration of BFU-E produced from *Slc29a3*<sup>+/+</sup> (*black*) and *Slc29a3*<sup>-/-</sup> (*red*) HSPCs  
419 isolated from 2, 5, and 12-week-old mice (*n* = 6 mice/group, mean ± SEM, \**p* < 0.05 by two-  
420 tailed t-test). **(d)** Colony enumeration of BFU-E produced from *Slc29a3*<sup>+/+</sup> (*black*) and *Slc29a3*<sup>-/-</sup>  
421 (*red*) spleen cells isolated from 2, 5, and 12-week-old mice (*n* = 3 mice/group, mean ± SEM, \**p*  
422 < 0.05 by two-tailed t-test).

423

424

425

426

427

428

429

430

431

432

433

434

435

436

437

438



Supplemental Figure 3

**a**

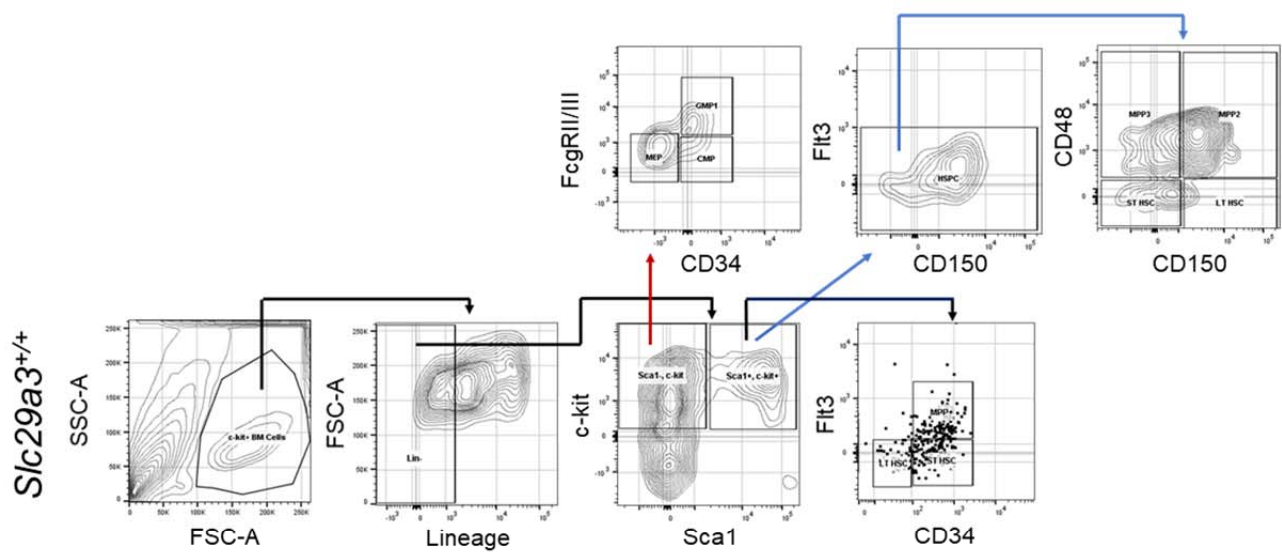

**b**

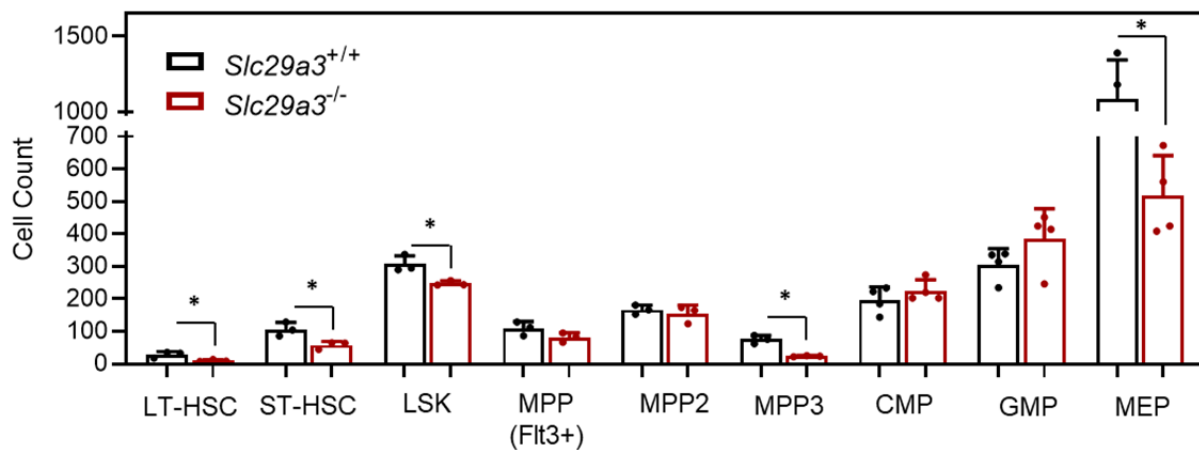

470 **Supplemental Fig. 3.** The loss of ENT3 alters the cell count of HSPC subpopulations in  
471 *Slc29a3*<sup>-/-</sup> mice. **(a)** Representative gating strategy for HSPC subpopulations (LT-HSC, ST-HSC,  
472 LSK+, MPP FLT3+, MPP2, MPP3, CMP, GMP, and MEP) from *Slc29a3*<sup>+/+</sup> and *Slc29a3*<sup>-/-</sup> mice  
473 presented in supplemental fig. S9B and S9C. **(b)** HSPC subpopulations cell count derived from  
474 analytical cytometry analysis of c-kit enriched bone marrow cells isolated from 12 week old  
475 *Slc29a3*<sup>+/+</sup> (*black*) and *Slc29a3*<sup>-/-</sup> (*red*) mice (*n* = 3 mice/group, mean ± SEM, \**p* < 0.05 by two-  
476 tailed t-test).

477

478

479

480

481

482

483

484

485

486

487

488

489

490

491

492

493

494

495

## Supplemental Figure 4

### a Flow Cytometry Gating Strategy for ER Stress Markers (GRP78, GRP94, Eif2a, and p-PERK)

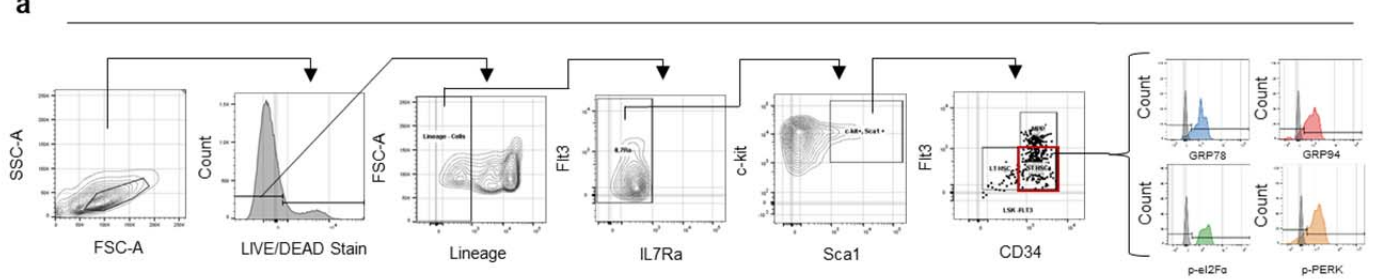

### b Flow Cytometry Gating Strategy for Aggresome Marker ThioFlavin T (TFT)

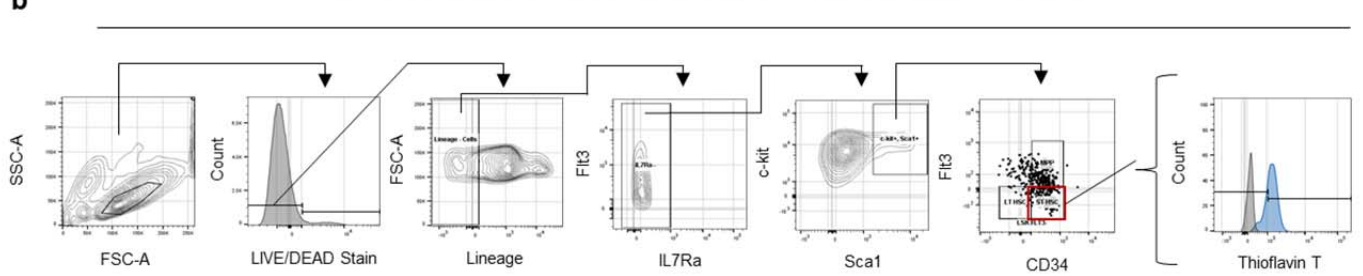

### c Flow Cytometry Gating Strategy for Apoptosis Markers (Annexin V and Cleaved Caspase-3)

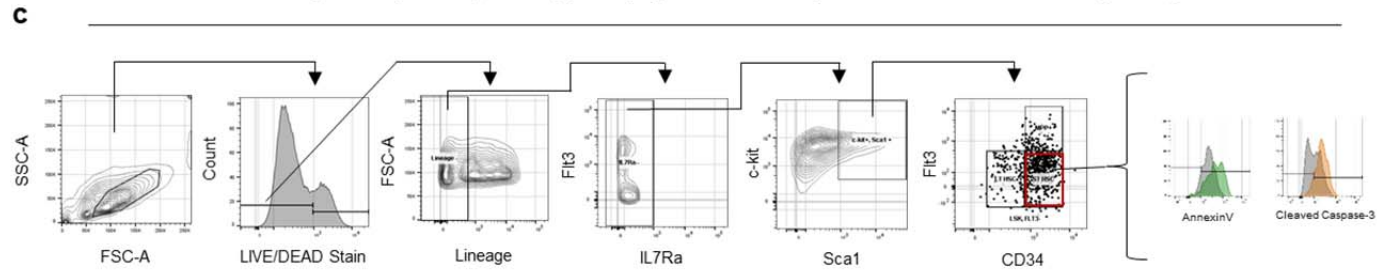

### d Flow Cytometry Gating Strategy for Cell Cycle (Ki-67 VS DNA Content)

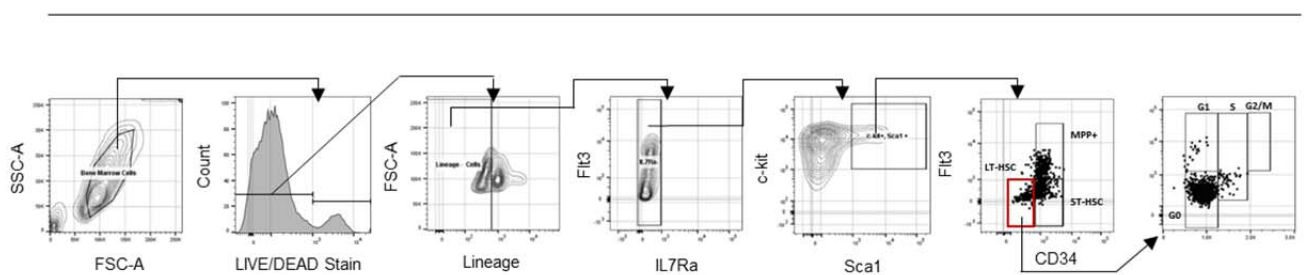

### e Flow Cytometry Gating Strategy for Bone Marrow Transplantation Experiments

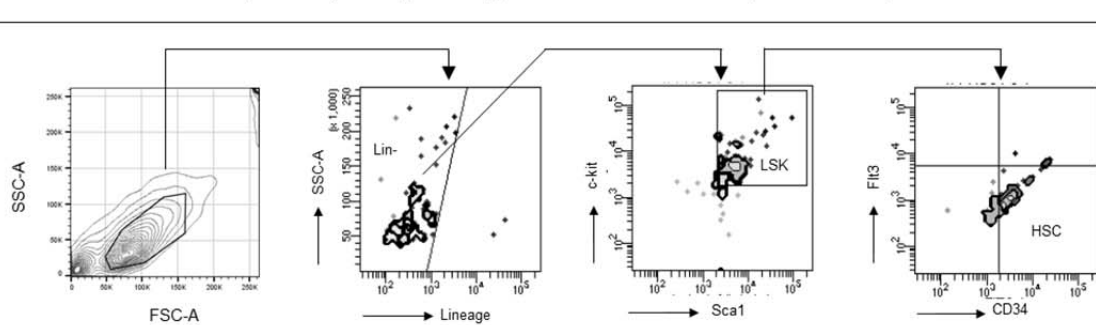

528 **Supplemental Fig. 4.** Flow cytometry gating strategies for ER stress, aggresome, apoptosis, and  
529 cell cycle markers. **(a)** ER stress marker (GRP78, GRP94, Eif2a, and p-PERK) gating strategy  
530 for HSPC populations (LSK, LSK FLT3<sup>-</sup>, ST-HSCs and LT-HSCs) from *Slc29a3*<sup>+/+</sup> and  
531 *Slc29a3*<sup>-/-</sup> mice presented in fig. 2a and fig. S6 and S7. **(b)** Aggresome marker (TFT) gating  
532 strategy for HSPC populations (LSK, LSK Flt3<sup>-</sup>, ST-HSCs and LT-HSCs) from *Slc29a3*<sup>+/+</sup> and  
533 *Slc29a3*<sup>-/-</sup> mice presented in fig 2a and fig. S6 and S7. **(c)** Apoptosis marker (Annexin V and  
534 Cleaved Caspase-3) gating strategy for HSPC populations (LSK, LSK FLT3<sup>-</sup>, ST-HSCs and LT-  
535 HSCs) from *Slc29a3*<sup>+/+</sup> and *Slc29a3*<sup>-/-</sup> mice presented in fig. 2a and fig. S6 and S7. **(d)** Cell cycle  
536 (Ki-67 and Hoecht 33342) gating strategy for HSPC subpopulations from *Slc29a3*<sup>+/+</sup> and  
537 *Slc29a3*<sup>-/-</sup> mice presented in fig 2b. **(e)** Gating strategy for lineage depleted HSC populations  
538 (Lin<sup>-</sup>, c-kit<sup>+</sup>, Sca1<sup>+</sup>, FLT3, CD34<sup>+</sup>) from *Slc29a3*<sup>+/+</sup> and *Slc29a3*<sup>-/-</sup> transplant mice presented in  
539 fig 3.

540

541

542

543

544

545

546

547

548

549

550

551

552

553

554

555

556

Supplemental Figure 5

a

|                |                               | Averaged RAW Ct Values |        |                          |      |                       |      |
|----------------|-------------------------------|------------------------|--------|--------------------------|------|-----------------------|------|
|                |                               | LT-HSC                 | ST-HSC | MPP (Flt3 <sup>+</sup> ) | LSK  | c-kit <sup>+</sup> BM | BM   |
| <i>Slc29a3</i> | <i>Slc29a3</i> <sup>+/+</sup> | 26.5                   | 29.3   | 27.6                     | 25.3 | 21.8                  | 18.2 |
|                | <i>Slc29a3</i> <sup>-/-</sup> | 31.1                   | 32.0   | 32.3                     | 32.3 | 30.7                  | 33.2 |
| <i>GAPDH</i>   | <i>Slc29a3</i> <sup>+/+</sup> | 21.3                   | 23.3   | 24.6                     | 23.3 | 16.1                  | 12.5 |
|                | <i>Slc29a3</i> <sup>-/-</sup> | 22.0                   | 22.5   | 22.5                     | 21.2 | 18.2                  | 14.6 |

b

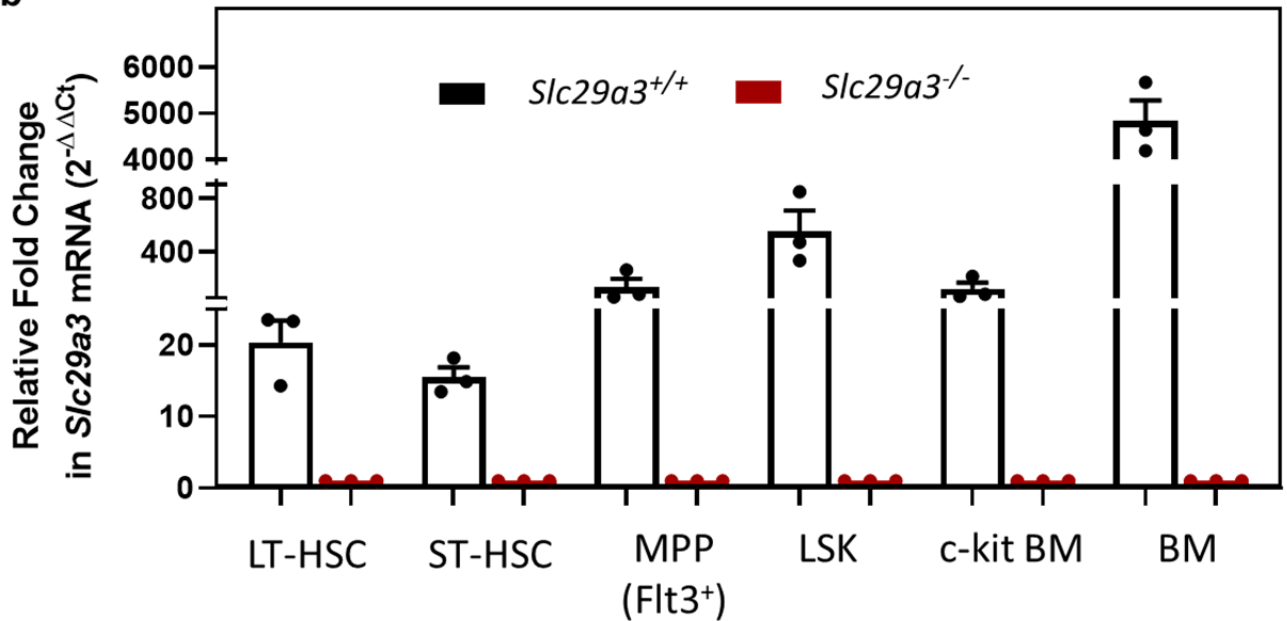

c

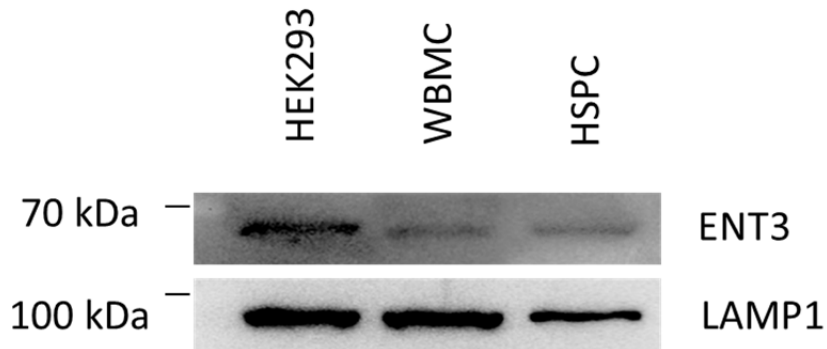

557  
558  
559  
560  
561  
562  
563  
564  
565  
566  
567  
568  
569  
570  
571  
572  
573  
574  
575  
576  
577  
578  
579  
580  
581  
582  
583  
584  
585  
586  
587  
588  
589  
590  
591  
592  
593  
594  
595  
596

597 **Supplemental Fig. 5.** *Slc29a3* expression in HSPC subpopulations. **(a)** Averaged raw Ct values  
598 after amplification of *Slc29a3* and *GAPDH* from LT-HSCs, ST-HSCs, MPP+, LSK, c-kit bone  
599 marrow (BM), and crude BM cells isolated from 5-week-old *Slc29a3*<sup>+/+</sup> and *Slc29a3*<sup>-/-</sup> mice. **(b)**  
600 qPCR data normalized to *GAPDH* and *Slc29a3*<sup>+/+</sup> mouse gene expression presented as relative  
601 fold change ( $2^{-\Delta\Delta Ct}$ ) for each cell population from *Slc29a3*<sup>+/+</sup> (*black*) and *Slc29a3*<sup>-/-</sup> (*red*) mice  
602 ( $n = 3$  mice/group, mean  $\pm$  SEM). **(c)** Representative immunoblots of lysosomal ENT3 from  
603 HEK293 (positive control), bone marrow cells, and HSPCs from *Slc29a3*<sup>+/+</sup> mice. Lysosomal  
604 fractionation was confirmed with co-fractionation with the lysosomal membrane marker  
605 LAMP1. One representative blot from three independent experiments is shown.

606

607

608

609

610

611

612

613

614

615

616

617

618

619

620

621

622

623

# Supplemental Figure 6

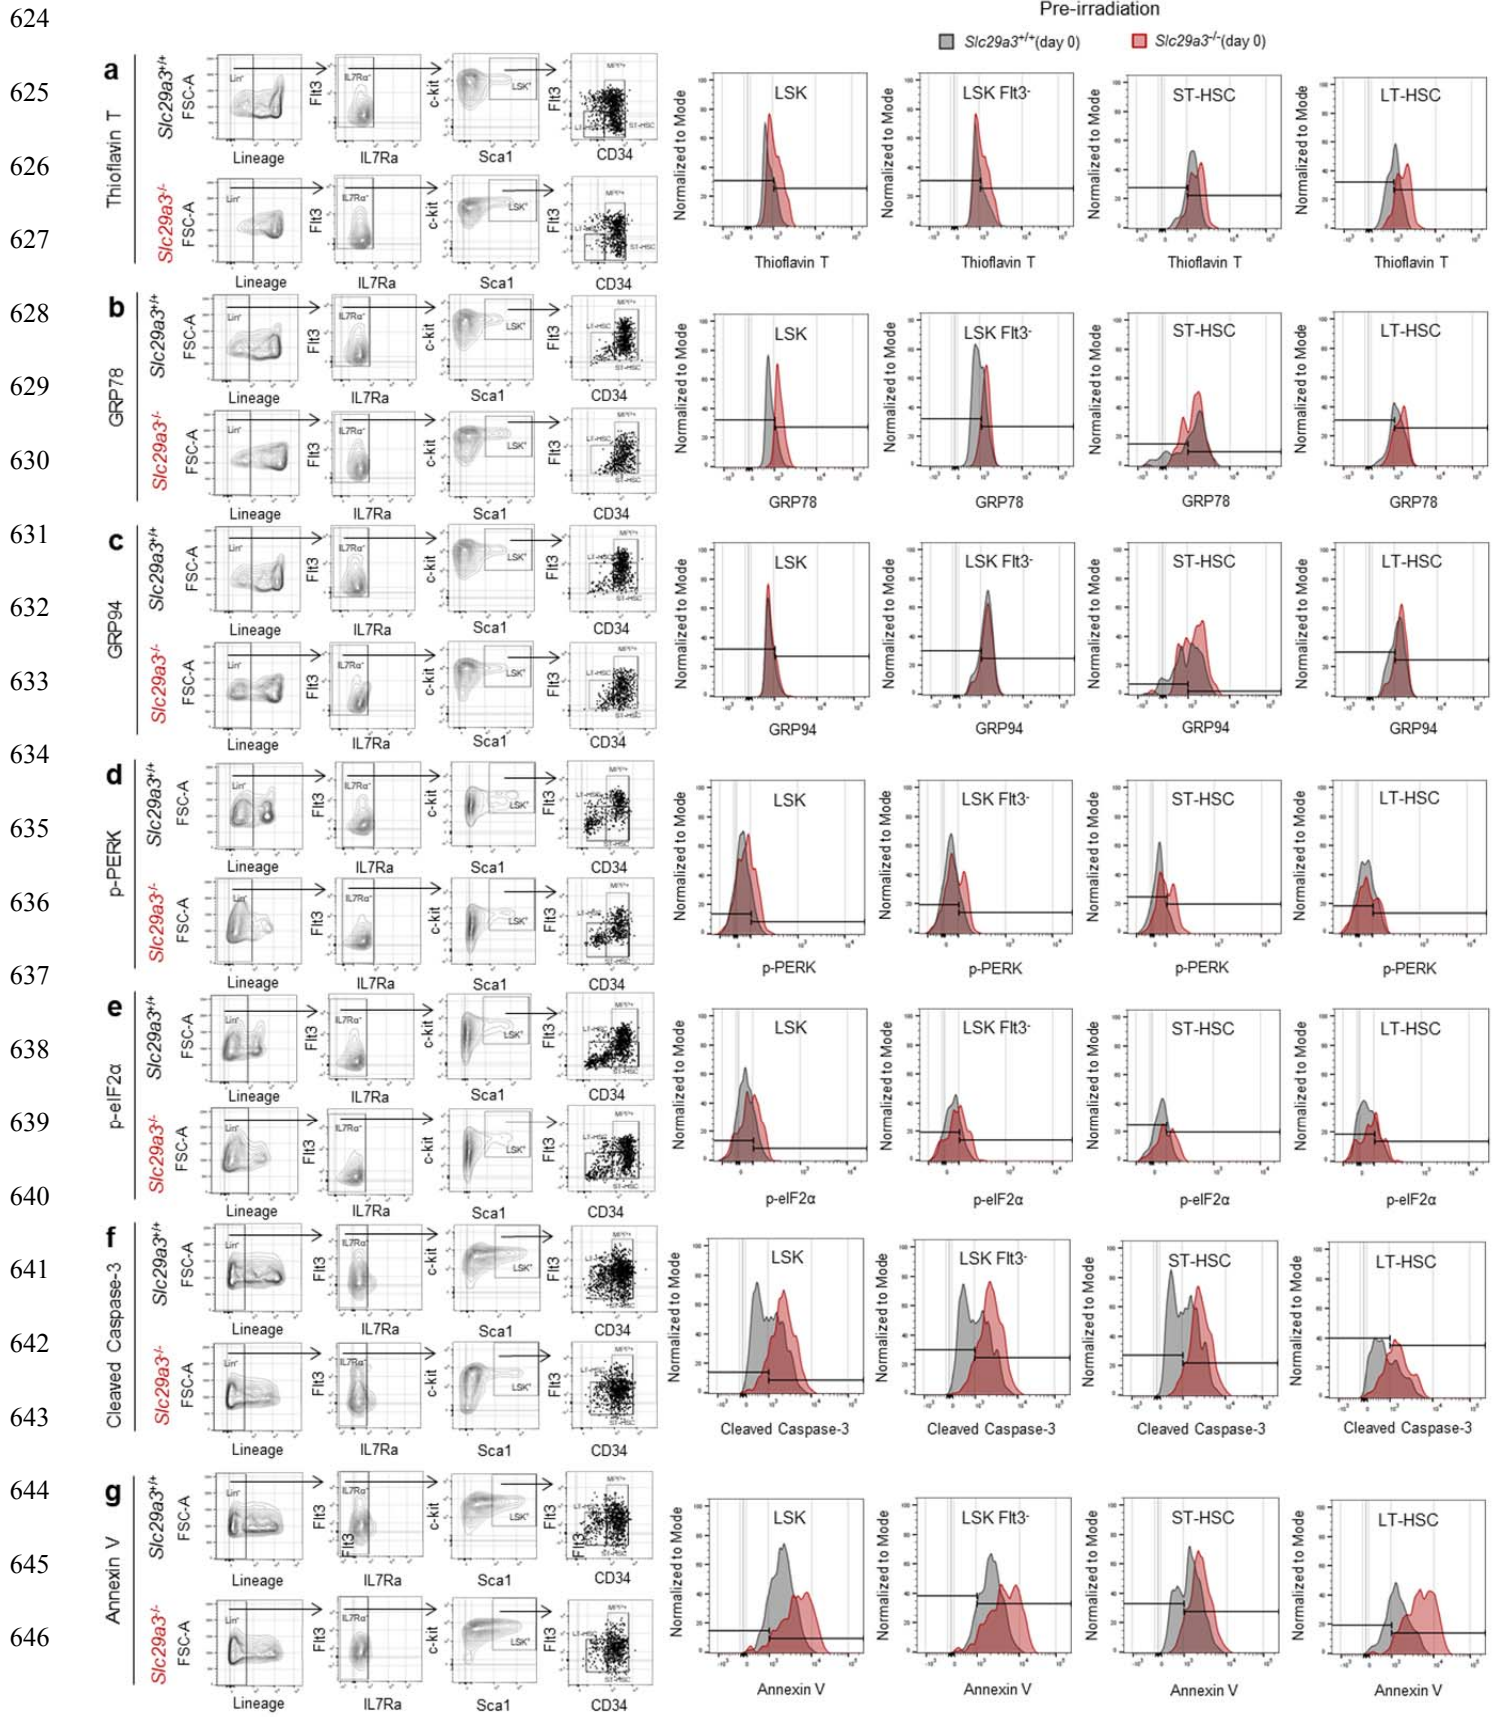

647 **Supplemental Fig. 6.** Flow cytometry profiling of ER stress, apoptosis, and aggresomal markers  
648 pre-irradiation. LSK, LSK FLT3-, ST-HSCs and LT-HSCs were examined for **(a)** Thioflavin T  
649 (ThT) stained unfolded proteins (ThT<sup>+</sup>), **(b)** GRP78, **(c)** GRP94, **(d)** p-eIF2 $\alpha$ , **(e)** p-PERK, **(f)**  
650 Cleaved Caspase-3, and **(g)** Annexin V in 8-week old *Slc29a3*<sup>+/+</sup> and *Slc29a3*<sup>-/-</sup> mice before  
651 irradiation. Gating strategy for HSPC populations (LSK, LSK Flt3-, ST-HSCs and LT-HSCs)  
652 from *Slc29a3*<sup>+/+</sup> and *Slc29a3*<sup>-/-</sup> mice followed by a histogram overlay of *Slc29a3*<sup>+/+</sup> (gray) and  
653 *Slc29a3*<sup>-/-</sup> (red) are presented for each biomarker.

654

655

656

657

658

659

660

661

662

663

664

665

666

667

668

669

670

671

672

673



# Supplemental Figure 7

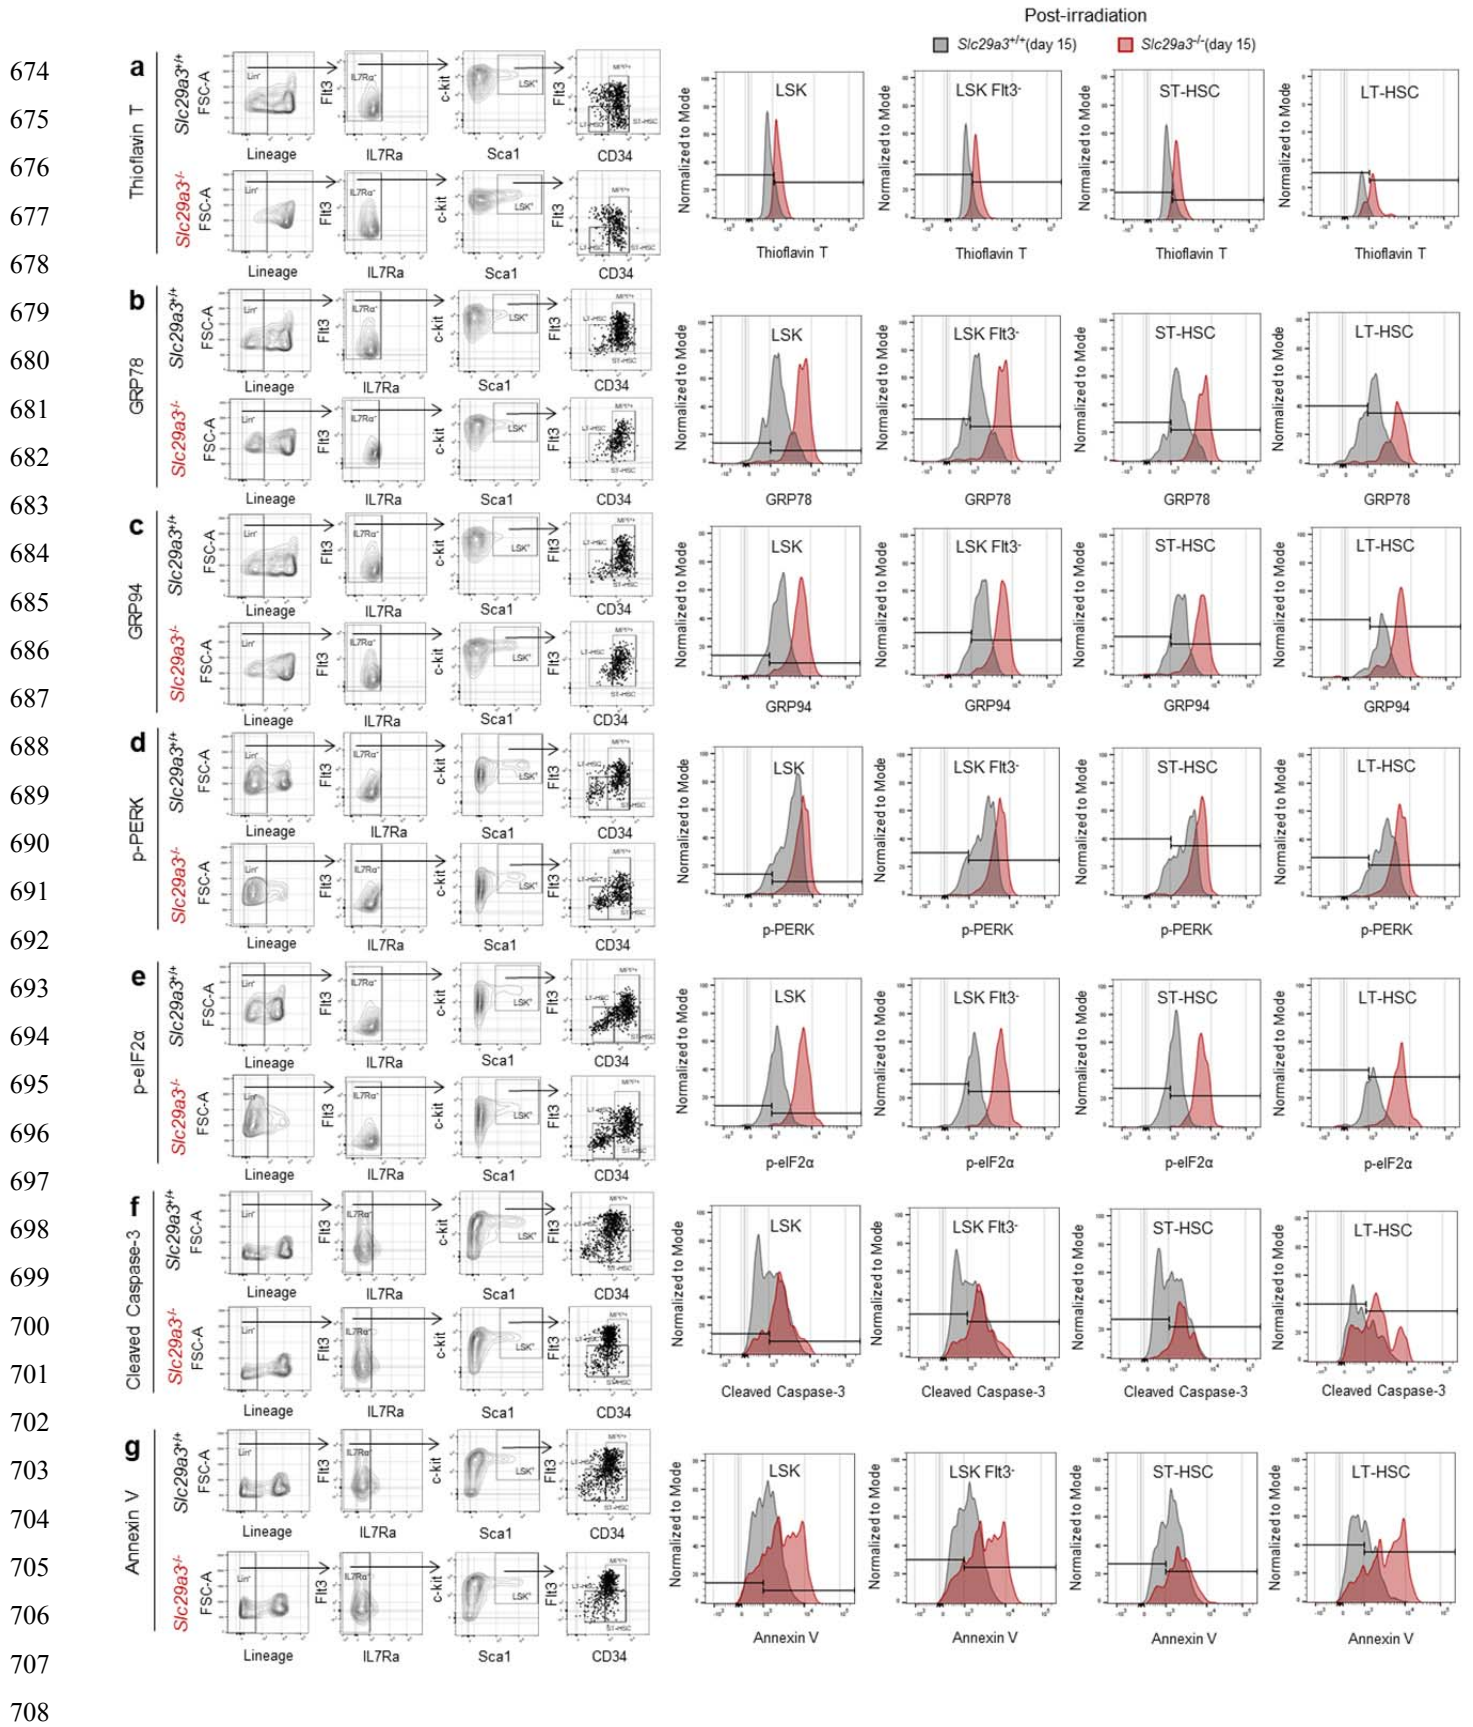

709 **Supplemental Fig. 7.** Flow cytometry profiling of ER stress, apoptosis, and aggresomal markers  
710 post-irradiation. LSK, LSK FLT3-, ST-HSCs and LT-HSCs were examined for **(a)** Thioflavin T  
711 (ThT) stained unfolded proteins (ThT<sup>+</sup>), **(b)** GRP78, **(c)** GRP94, **(d)** p-eIF2 $\alpha$ , **(e)** p-PERK, **(f)**  
712 Cleaved Caspase-3, and **(g)** Annexin V in 8-week old *Slc29a3*<sup>+/+</sup> and *Slc29a3*<sup>-/-</sup> mice 15 days  
713 after sub-lethal irradiation (6.5 Gy). Gating strategy for HSPC populations (LSK, LSK Flt3-, ST-  
714 HSCs and LT-HSCs) from *Slc29a3*<sup>+/+</sup> and *Slc29a3*<sup>-/-</sup> mice followed by a histogram overlay of  
715 *Slc29a3*<sup>+/+</sup> (gray) and *Slc29a3*<sup>-/-</sup> (red) are presented for each biomarker.

716

717

718

719

720

721

722

723

724

725

726

727

728

729

730

731

732

Supplemental Figure 8

**a**

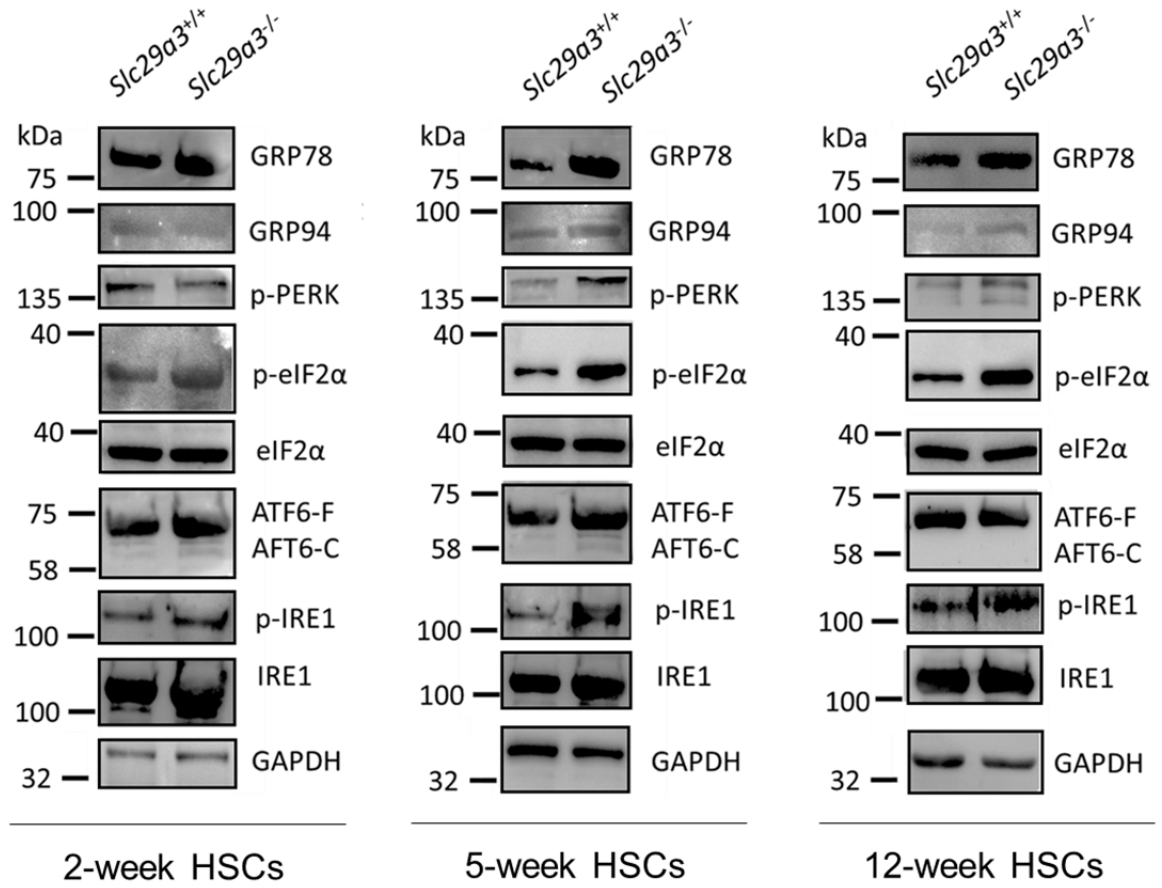

**b**

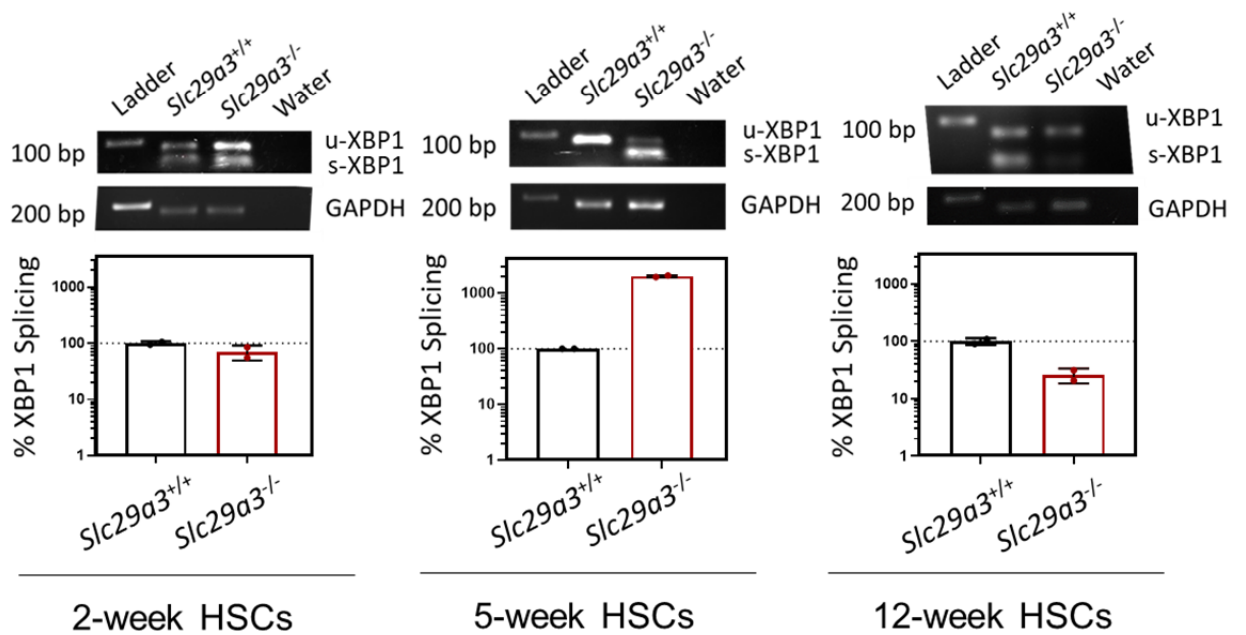

734 **Supplemental Fig. 8.** The loss of ENT3 activates the unfolded protein response in *Slc29a3*<sup>-/-</sup>  
735 mouse HSCs. **(a)** Representative immunoblots of proteins from the PERK, ATF6, and IRE1 arm  
736 of the unfolded protein response in *Slc29a3*<sup>+/+</sup> and *Slc29a3*<sup>-/-</sup> mouse ST-HSCs at 2, 5, and 12  
737 weeks of age. One representative blot from three independent experiments is shown for each  
738 experimental condition. **(b)** XBP1 splicing assay of cDNA extracted from *Slc29a3*<sup>+/+</sup> (*black*) and  
739 *Slc29a3*<sup>-/-</sup> (*red*) mouse ST-HSCs at 2, 5, and 12 weeks of age. RT-PCR of sXBP1 and uXBP1  
740 was run on a 3% agarose gel and visualized with ethidium bromide followed by XBP1 splicing  
741 quantification (*n* = 2 mice/group).  
742

743

744

745

746

747

748

749

750

751

752

753

754

755

756

757

758

759

760

761  
762  
763  
764  
765  
766  
767  
768  
769  
770  
771  
772  
773  
774  
775  
776  
777  
778  
779  
780  
781  
782  
783  
784  
785  
786  
787  
788  
789  
790  
791  
792  
793  
794

### Supplemental Figure 9

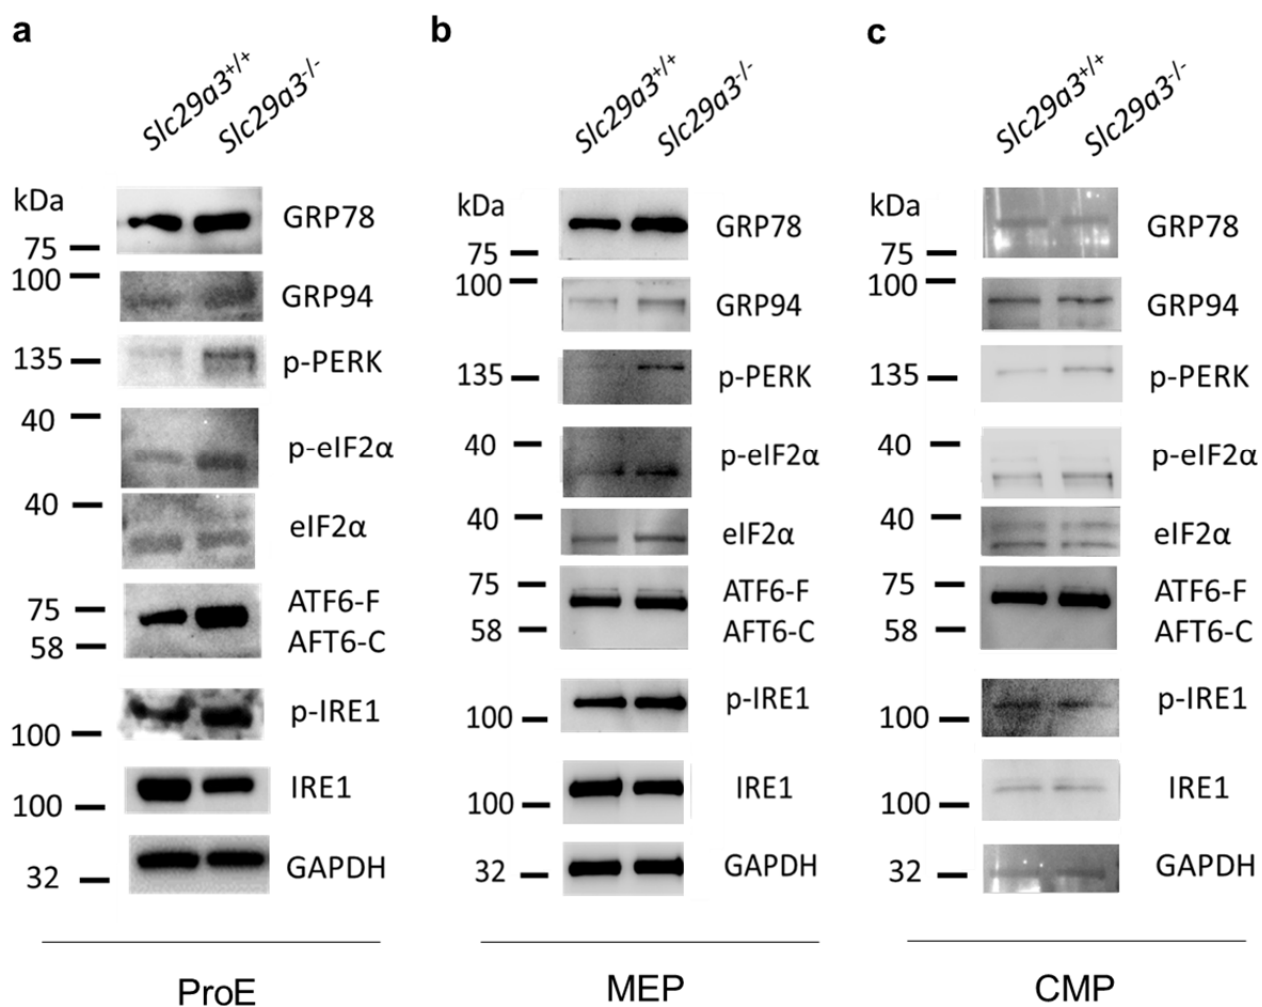

795 **Supplemental Fig. 9.** ENT3 loss activates the unfolded protein response in *Slc29a3*<sup>-/-</sup> mouse  
796 erythroid precursors and progenitors. **(a)** Representative immunoblots of proteins from the  
797 PERK, ATF6, and IRE1 arm of the unfolded protein response in *Slc29a3*<sup>+/+</sup> and *Slc29a3*<sup>-/-</sup> mouse  
798 ProE cells at 12 weeks of age. **(b)** Representative immunoblots of proteins from the PERK,  
799 ATF6, and IRE1 arm of the unfolded protein response in *Slc29a3*<sup>+/+</sup> and *Slc29a3*<sup>-/-</sup> mouse MEP  
800 cells at 12 weeks of age. **(c)** Representative immunoblots of proteins from the PERK, ATF6, and  
801 IRE1 arm of the unfolded protein response in *Slc29a3*<sup>+/+</sup> and *Slc29a3*<sup>-/-</sup> mouse CMP cells at 12  
802 weeks of age. One representative blot from three independent experiments is shown for each  
803 experimental condition.

804

805

806

807

808

809

810

811

812

813

814

815

816

817

818

819

820

821

822

### Supplemental Figure 10

823

824

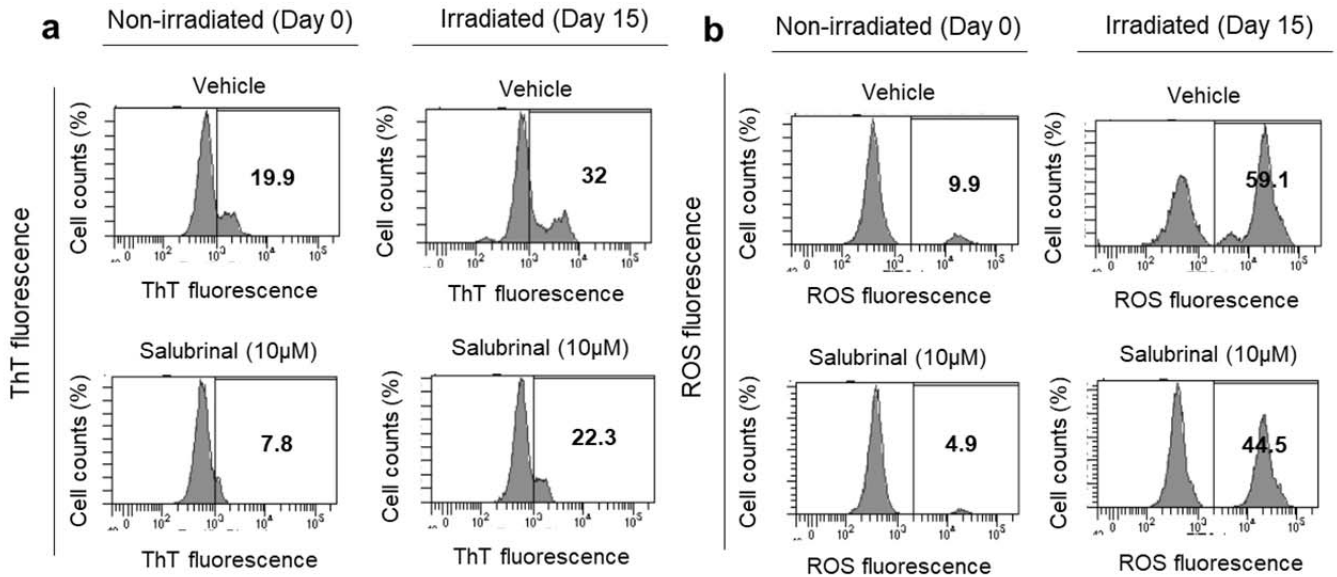

835

836

837

838

839

840

841

842

843

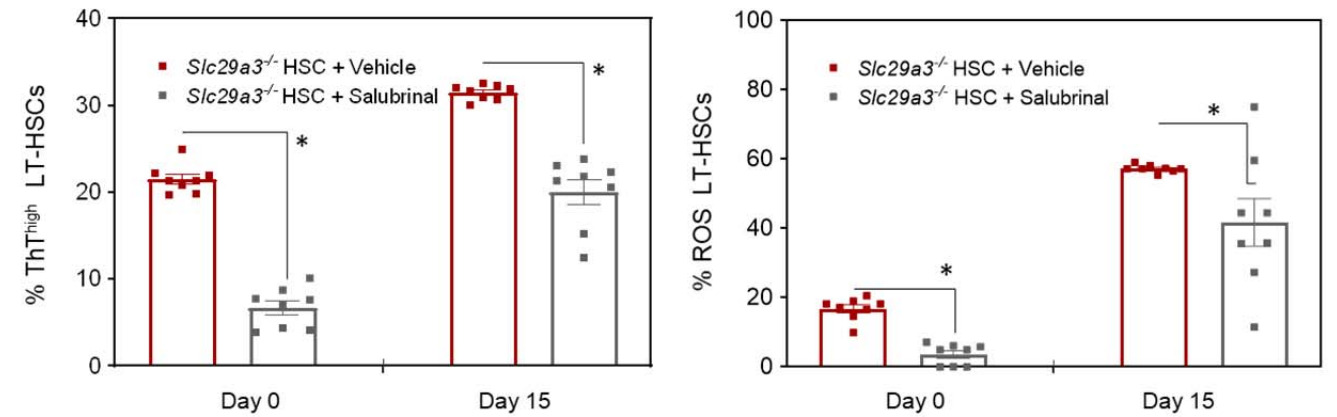

844

845

846

847

848

849

850

851

852

853

854

855

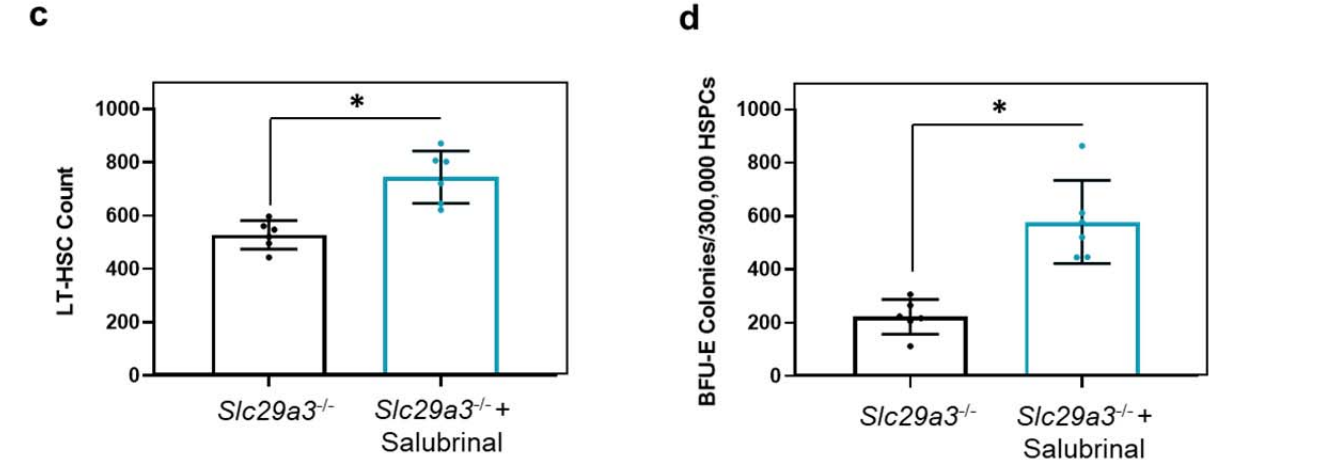

856 **Supplemental Fig. 10.** Salubrinal treatment of *Slc29a3*<sup>-/-</sup> mice reduces aggresomes and reactive  
857 oxygen species. **(a)** LT-HSCs isolated from *Slc29a3*<sup>-/-</sup> mice have reduced Thioflavin T (ThT)  
858 fluorescence with (*grey*) and without (*red*) salubrinal treatment pre- and post-irradiation. Data  
859 represent mean±SEM (n=8 mice/group, \*p < 0.05 by two-tailed t-test). **(b)** LT-HSCs isolated  
860 from *Slc29a3*<sup>-/-</sup> mice have reduced reactive oxygen species (ROS) with (*grey*) and without (*red*)  
861 salubrinal treatment pre- and post-irradiation. Data represent mean±SEM (n=8 mice/group, \*p <  
862 0.05 by two-tailed t-test). **(c)** LT-HSC count after treatment of *Slc29a3*<sup>-/-</sup> HSPCs with (*black*) or  
863 without (*blue*) salubrinal (10 mM) (n = 6 mice/group, mean ± SEM, \*p < 0.05 by two-tailed t-  
864 test). **(d)** Colony enumeration of burst forming unit-erythrocytes (BFU-E) produced from  
865 *Slc29a3*<sup>+/+</sup> and *Slc29a3*<sup>-/-</sup> HSPCs after vehicle (DMSO)(*black*) or salubrinal (10 mM) (*blue*)  
866 treatment for 24 hours (n = 6 mice/group, mean ± SEM, \*p < 0.05 by two-tailed t-test).

867  
868  
869  
870  
871  
872  
873  
874  
875  
876  
877  
878  
879  
880  
881  
882  
883  
884  
885  
886  
887  
888  
889  
890  
891  
892  
893  
894  
895  
896  
897  
898  
899



# Supplemental Figure 11

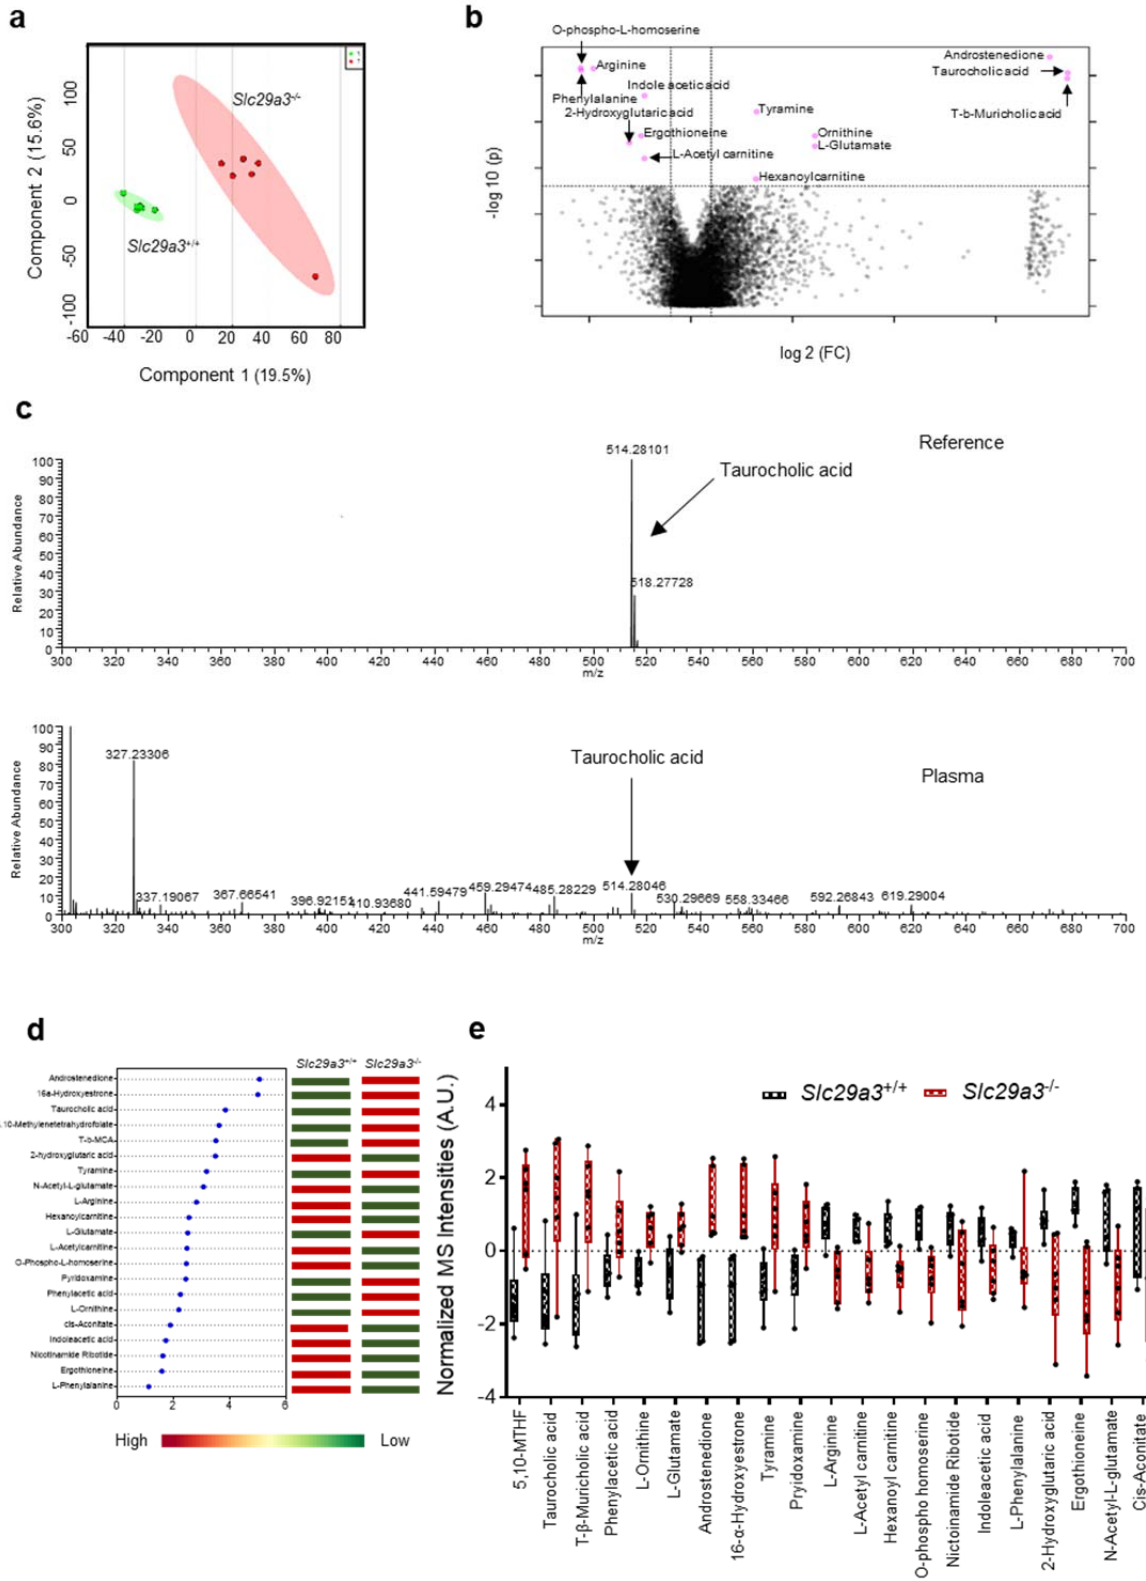

Plasma

901 **Supplemental Fig. 11.** Analysis of differentially produced metabolites in *Slc29a3*<sup>-/-</sup> plasma. **(a)**  
902 Projection to latent structure-discriminant analysis (PLS-DA) score plot constructed based on  
903 metabolic profiles of *Slc29a3*<sup>+/+</sup> and *Slc29a3*<sup>-/-</sup> plasma samples (*green*, *Slc29a3*<sup>+/+</sup>; *red*, *Slc29a3*<sup>-/-</sup>  
904 ). **(b)** Volcano plots showing metabolite profiles of *Slc29a3*<sup>+/+</sup> compared with *Slc29a3*<sup>-/-</sup> plasma  
905 samples. Dotted lines along x axis represent  $\pm \log_2(2)$  fold change and the dotted line along y  
906 axis represents  $-\log_{10}(0.05)$ . *pink*, differential metabolites; *black*, other metabolites. **(c)**  
907 Representative reference standard and plasma sample MS2 spectra used for identification of the  
908 metabolite taurocholic acid. **(d)** Variable in projection (VIP) plot illustrating the 21 significantly  
909 altered metabolites in *Slc29a3*<sup>-/-</sup> mice plasma ranked on the basis of PLS-DA modelling. The  
910 colored boxes represent the relative levels of the metabolites in each group. *red*, high; *green*, low.  
911 **(e)** Box-whisker plot representation of 21 significantly altered metabolites in *Slc29a3*<sup>-/-</sup> mice  
912 plasma samples. Values, Mean  $\pm$  S.E.M; n=6 mice/group, \*, p<0.05 by two-tailed t-test  
913 comparing *Slc29a3*<sup>+/+</sup> and *Slc29a3*<sup>-/-</sup> and fold change >2.0 w.r.t *Slc29a3*<sup>+/+</sup>. Box plots represent  
914 the median (middle line), 25th, and 75th percentile (box), while the whiskers span from the  
915 minimum to the maximum value.

916  
917  
918  
919  
920  
921  
922  
923  
924  
925  
926  
927  
928  
929  
930  
931  
932  
933  
934  
935  
936  
937  
938  
939  
940  
941  
942  
943  
944

# Supplemental Figure 12

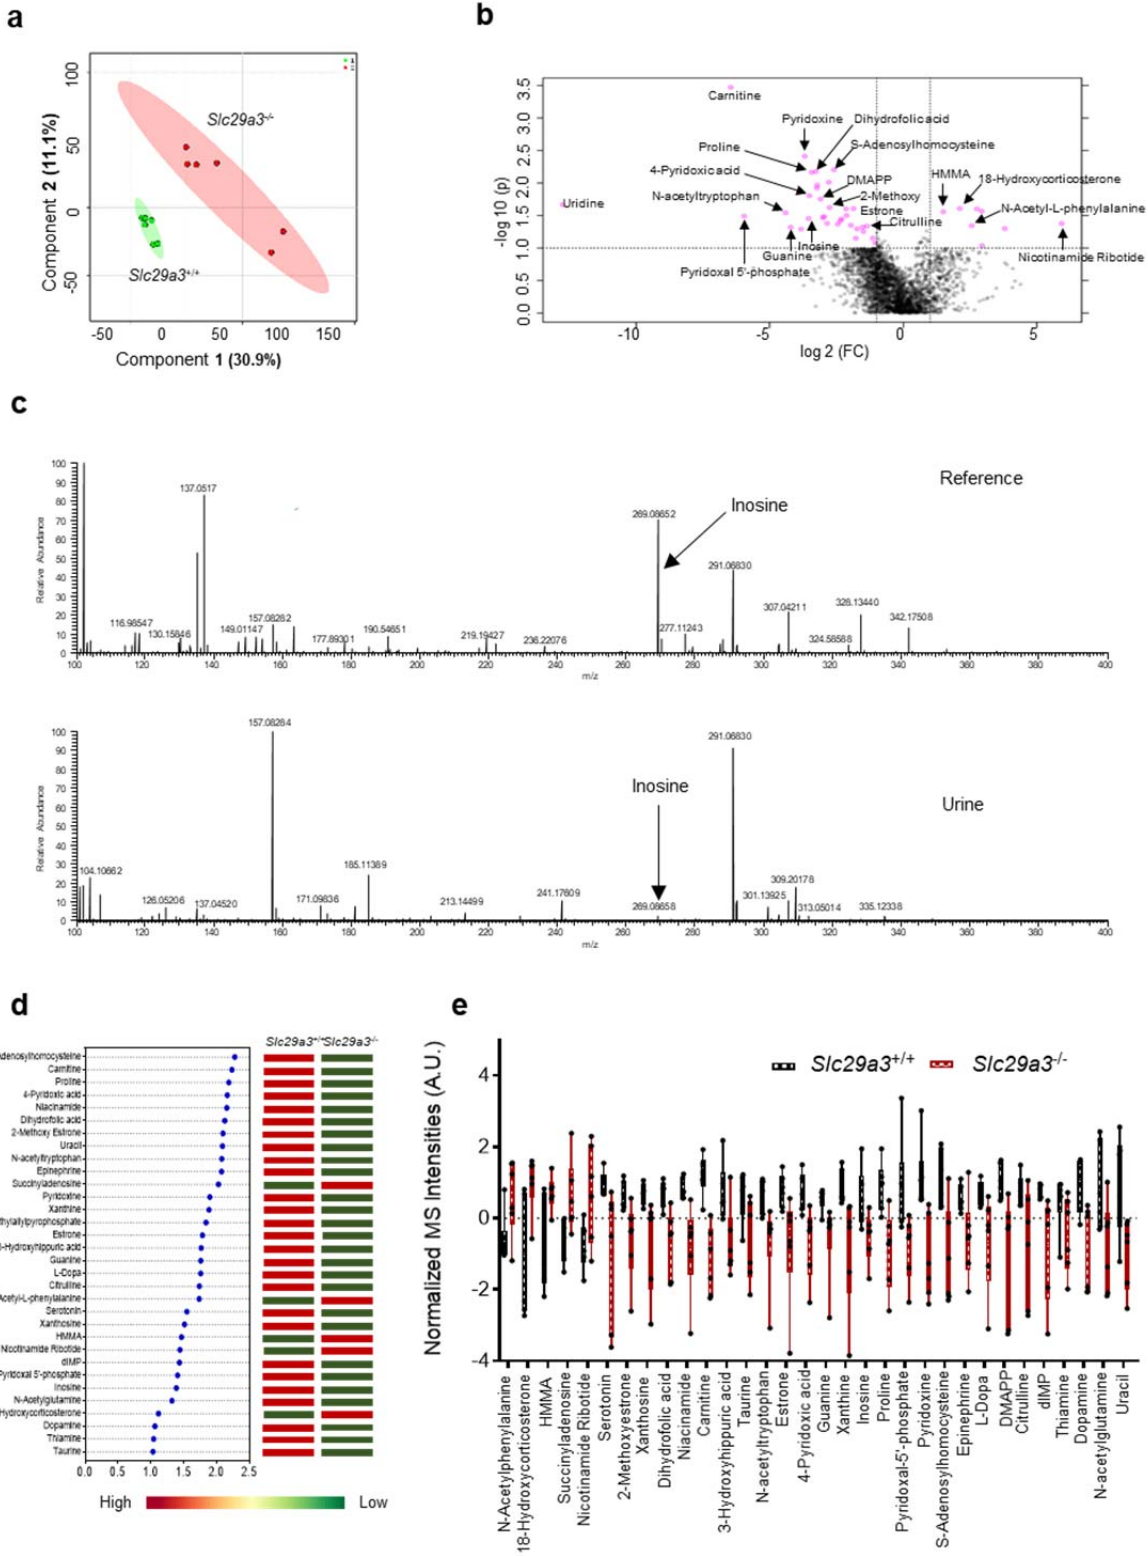

Urine

946  
947  
948  
949  
950  
951  
952  
953  
954  
955  
956  
957  
958  
959  
960  
961  
962  
963  
964  
965  
966  
967  
968  
969  
970  
971  
972  
973  
974  
975  
976  
977  
978  
979  
980  
981  
982  
983  
984  
985  
986  
987  
988  
989  
990

**Supplemental Fig. 12.** Analysis of differentially produced metabolites in *Slc29a3*<sup>-/-</sup> urine. **(a)** PLS-DA score plot constructed based on metabolic profiles of *Slc29a3*<sup>+/+</sup> and *Slc29a3*<sup>-/-</sup> urine. **(b)** Volcano plot for comparison of *Slc29a3*<sup>+/+</sup> and *Slc29a3*<sup>-/-</sup> urine. **(c)** Representative reference standard and urine sample MS2 spectra used for identification of the metabolite inosine. **(d)** VIP plot for 32 significantly altered metabolites in *Slc29a3*<sup>-/-</sup> urine. **(e)** Box-whisker plot representation of for 32 significantly altered metabolites in *Slc29a3*<sup>-/-</sup> mice urine. Values, Mean ± S.E.M; n=6 mice/group, \*, p<0.05 by two-tailed t-test comparing *Slc29a3*<sup>+/+</sup> and *Slc29a3*<sup>-/-</sup> and Fold change >2.0 w.r.t *Slc29a3*<sup>+/+</sup>. Box plots represent the median (middle line), 25th, and 75th percentile (box), while the whiskers span from the minimum to the maximum value.

## Supplemental Figure 13

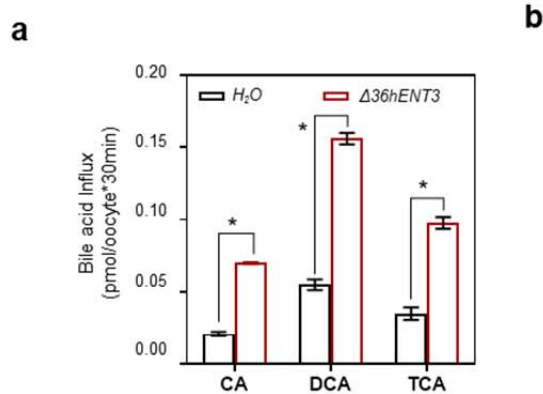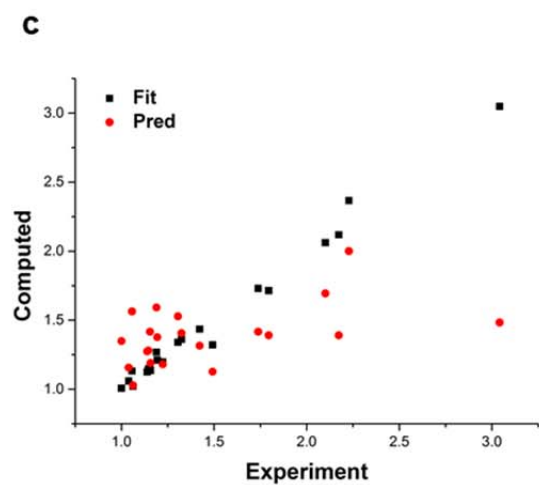

| Bile acid | Exp   | Fit   | Pred  | Err Pred |
|-----------|-------|-------|-------|----------|
| TCA       | 3.042 | 3.048 | 1.483 | -1.559   |
| DCA       | 2.101 | 2.061 | 1.694 | -0.407   |
| CA        | 2.228 | 2.366 | 2     | -0.228   |
| UDCA      | 2.173 | 2.118 | 1.39  | -0.783   |
| TUDCA     | 1.795 | 1.714 | 1.39  | -0.405   |
| GCA       | 1.738 | 1.73  | 1.416 | -0.322   |
| GUDCA     | 1.422 | 1.435 | 1.315 | -0.107   |
| HCA       | 1.492 | 1.321 | 1.127 | -0.365   |
| CDCA      | 1.223 | 1.197 | 1.18  | -0.043   |
| MCA       | 1.189 | 1.268 | 1.592 | 0.403    |
| TMCA      | 1.305 | 1.34  | 1.528 | 0.223    |
| Bile acid | Exp   | Fit   | Pred  | Err Pred |
| GCDCA     | 1.324 | 1.361 | 1.406 | 0.082    |
| LCA       | 1.139 | 1.125 | 1.274 | 0.135    |
| DHCA      | 1.145 | 1.146 | 1.279 | 0.134    |
| HDCA      | 1.057 | 1.132 | 1.563 | 0.506    |
| THDCA     | 1.039 | 1.059 | 1.156 | 0.117    |
| THCA      | 1     | 1.007 | 1.349 | 0.349    |
| GLCA      | 1.062 | 1.021 | 1.028 | -0.034   |
| GDCA      | 1.193 | 1.211 | 1.377 | 0.184    |
| GDHCA     | 1.157 | 1.135 | 1.189 | 0.032    |
| GHCA      | 1.154 | 1.159 | 1.416 | 0.262    |

1032  
1033  
1034  
1035  
1036  
1037  
1038  
1039  
1040  
1041  
1042  
1043  
1044  
1045  
1046  
1047  
1048  
1049  
1050  
1051  
1052  
1053  
1054  
1055  
1056  
1057  
1058  
1059  
1060  
1061  
1062  
1063  
1064  
1065  
1066  
1067  
1068  
1069  
1070  
1071  
1072  
1073  
1074  
1075

**Supplemental Fig. 13.** Radiometric BA transport assay in oocytes and fitted-predicted transport activities of BA. **(a)** Graphical representation of the transport activities of  $^3\text{H-CA}$ ,  $^3\text{H-DCA}$  and  $^3\text{H-TCA}$  by  $\Delta 36\text{hENT3}$  expressing oocytes with respect to water-injected oocytes. Uptake was measured in sodium-free transport buffer at pH 5.5. Data represent mean $\pm$ SEM (n=8 oocytes/group, \*p < 0.05 by two-tailed t-test) **(b)** The predicted versus experimental activity of ENT3 BA transport comparison data presented. Cross-validation regression coefficient,  $q^2 = 0.24$ ; regression coefficient  $r^2 = 0.98$ . Fit, fitted; Pred, predicted; Err Pred, error prediction. **(c)** Fitted (*black*) and predicted (*red*) transport activities for the 21 BAs in the Training Data Set. Fit, fitted; Pred, predicted.

Supplemental Figure 14

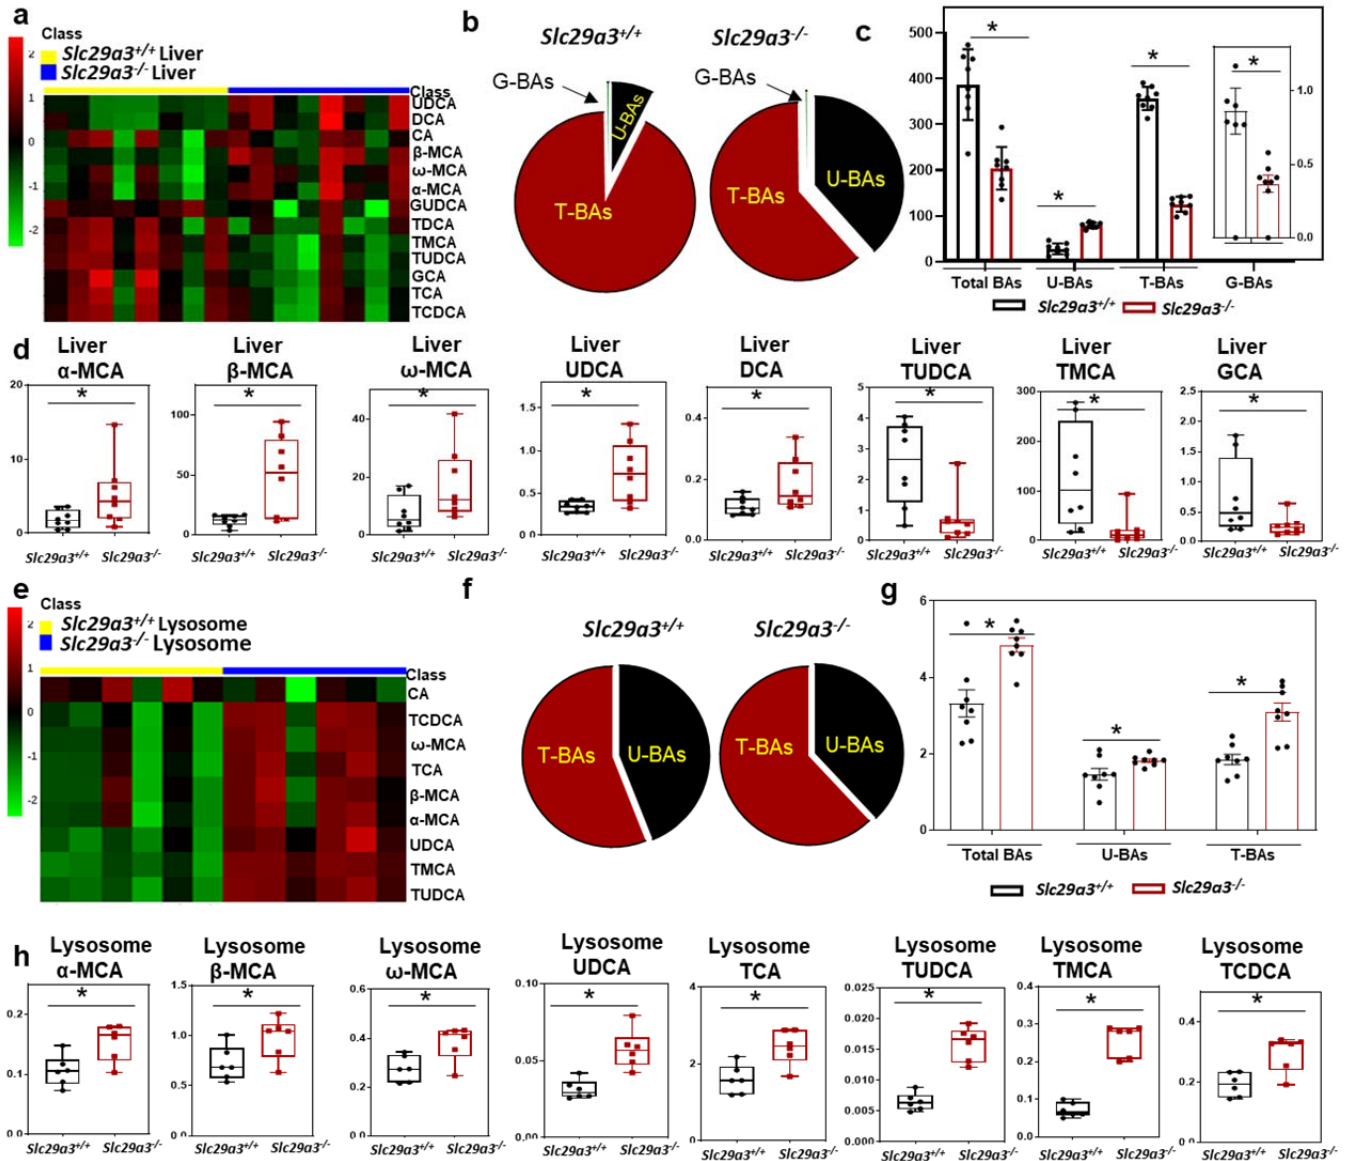

1076  
1077  
1078  
1079  
1080  
1081  
1082  
1083  
1084  
1085  
1086  
1087

1088 **Supplemental Fig. 14.** Targeted mass spectrometric analysis of *Slc29a3*<sup>-/-</sup> mouse liver and  
1089 lysosomes. **(a)** Heat map representing hierarchical clustering of 13 BAs determined by targeted  
1090 mass spectrometric analysis of 8 *Slc29a3*<sup>-/-</sup> mice liver samples. MS signal intensities were  
1091 clustered in two dimensions (row represent metabolites while column indicates samples) on the  
1092 basis of Euclidean distance. Colors indicate the metabolite abundances with red for high and  
1093 green for low. **(b)** Pie chart illustrating the bile acid composition in *Slc29a3*<sup>+/+</sup> and *Slc29a3*<sup>-/-</sup>  
1094 mice liver samples (n=8 mice/group). **(c)** The concentrations of liver total BAs, unconjugated  
1095 BAs (U-BAs), taurine-conjugated BAs (TBAs) and glycine-conjugated (GBAs) as determined by  
1096 LC-MS/MS analyses. Values, Mean ± S.E.M; n=8 mice/group, p<0.05 by two-tailed t-test  
1097 comparing *Slc29a3*<sup>+/+</sup> and *Slc29a3*<sup>-/-</sup>. **(d)** Box-whisker plot representation of significantly altered  
1098 BAs in *Slc29a3*<sup>-/-</sup> mice liver samples as determined by targeted LC-MS/MS analyses. Values,  
1099 Mean ± S.E.M; n=8 mice/group, p<0.05 versus *Slc29a3*<sup>+/+</sup>. Box plots represent the median  
1100 (middle line), 25th, and 75th percentile (box), while the whiskers span from the minimum to the  
1101 maximum value. **(e)** Heat map representing hierarchical clustering of 13 bile acids determined by  
1102 targeted mass spectrometric analysis of 8 *Slc29a3*<sup>-/-</sup> mice liver lysosome samples. MS signal  
1103 intensities were clustered in two dimensions (row represent metabolites while column indicates  
1104 samples) on the basis of Euclidean distance. Colors indicate the metabolite abundances with red  
1105 for high and green for low. **(f)** Pie chart illustrating the bile acid composition in *Slc29a3*<sup>+/+</sup> and  
1106 *Slc29a3*<sup>-/-</sup> mice liver lysosome samples (n=8 mice/group). **(g)** The concentrations of lysosome  
1107 total bile acids (BAs), unconjugated BAs (U-BAs), taurine-conjugated BAs (T-BAs) and  
1108 glycine-conjugated (G-BAs) as determined by LC-MS/MS analyses. Values, Mean ± S.E.M; n=8  
1109 mice/group, p<0.05 by two-tailed t-test comparing *Slc29a3*<sup>+/+</sup> and *Slc29a3*<sup>-/-</sup>. **(h)** Box-whisker  
1110 plot representation of significantly altered BAs in *Slc29a3*<sup>-/-</sup> mice liver samples as determined by  
1111 targeted LC-MS/MS analyses. Values, Mean ± S.E.M; n=8 mice/group, p<0.05 by two-tailed t-  
1112 test comparing *Slc29a3*<sup>+/+</sup> and *Slc29a3*<sup>-/-</sup>. Box plots represent the median (middle line), 25th, and  
1113 75th percentile (box), while the whiskers span from the minimum to the maximum value.

1114  
1115  
1116  
1117  
1118  
1119  
1120  
1121  
1122  
1123  
1124  
1125  
1126  
1127  
1128  
1129  
1130



Supplemental Figure 15

a

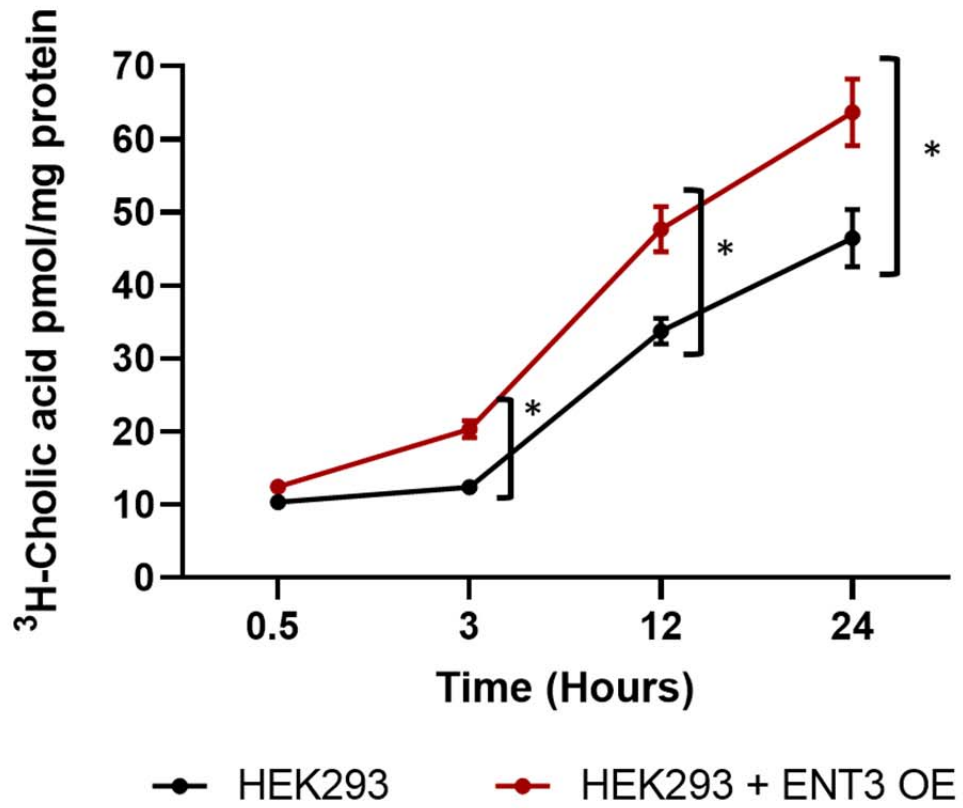

1131  
1132  
1133  
1134  
1135  
1136  
1137  
1138  
1139  
1140  
1141  
1142  
1143  
1144  
1145  
1146  
1147  
1148  
1149  
1150  
1151  
1152  
1153  
1154  
1155  
1156  
1157  
1158  
1159  
1160  
1161  
1162  
1163  
1164  
1165  
1166  
1167  
1168  
1169  
1170  
1171  
1172  
1173  
1174  
1175  
1176

1177 **Supplemental Fig. 15.** ENT3 overexpression increases BA accumulation in HEK293 cells. **(a)**  
1178 Uptake of <sup>3</sup>H-cholic acid into HEK293 (control)(*black*) and HEK293 overexpressing ENT3  
1179 (HEK293 + ENT3 OE)(*red*) were measured after cells were incubated with culture media  
1180 containing 1 μM cholic acid (including 0.02 μM <sup>3</sup>H-cholic acid) for 0.5, 3, 12, and 24 hours.  
1181 Data represent mean±SEM (n=3 biological replicates/group, \*p < 0.05 by two-tailed t-test).  
1182
