# Supplementary material for: Facilitative lysosomal transport of bile acids alleviates ER stress in mouse hematopoietic precursors
Source: PubMed Central journal article supplement (PMC7902824; doi:10.1038/s41467-021-21451-6), 2021-02-23
Supplement: 41467_2021_21451_MOESM3_ESM.pdf [file 41467_2021_21451_MOESM3_ESM.pdf]

## Description of Additional Supplementary Files

File Name: Supplementary Data 1

Description: Primer pairs used for PCR assay in the study

File Name: Supplementary Data 2

Description: Table representing normalized peak intensities, fold change, p-value and VIP score for all the detected features in untargeted profiling of *Slc29a3*<sup>-/-</sup> plasma samples. List of differential metabolites detected in the plasma from *Slc29a3*<sup>+/+</sup> and *Slc29a3*<sup>-/-</sup> mice (12 weeks age) based on a p-value < 0.05 using a one-sided t-test and a fold-change > 2.0. The m/z and ionization mode (positive ([M+H]<sup>+</sup>) or negative ([M-H]<sup>-</sup>)) are mentioned for all the detected metabolites. In addition to the fold change, the log<sub>2</sub>-fold change, p-value, -log<sub>10</sub> (p) and VIP score for each compound are indicated. The chemically annotated metabolites have been categorized according to their superclass—i.e., lipids ; amino and organic acids; carbohydrates; nucleosides, nucleotides, and analogues; organoheterocyclic compounds and benzenoids.

File Name: Supplementary Data 3

Description: Table representing normalized peak intensities, fold change, p-value and VIP score for all the detected features in untargeted profiling of *Slc29A3*<sup>-/-</sup> urine samples. List of differential metabolites detected in the urine from *Slc29a3*<sup>+/+</sup> and *Slc29a3*<sup>-/-</sup> mice (12 weeks age) based on a p-value < 0.05 calculated using a one-sided t-test and a fold-change > 2.0. The m/z and ionization mode (positive ([M+H]<sup>+</sup>) or negative ([M-H]<sup>-</sup>)) are mentioned for all the detected metabolites. In addition to the fold change, the log<sub>2</sub>-fold change, p-value, -log<sub>10</sub> (p) and VIP score for each compound are indicated. The chemically annotated metabolites have been categorized according to their superclass—i.e., lipids ; amino and organic acids; carbohydrates; nucleosides, nucleotides, and analogues; organoheterocyclic compounds and benzenoids.
